# Supplementary material
Source: MDPI journal article supplement (https://www.mdpi.com/2313-0105/8/12/288)
Supplement: s1 [file s1]

## Supplementary Materials

# Phenazine-Based Compound as a Universal Water-Soluble Anolyte Material for the Redox Flow Batteries

Elena I. Romadina<sup>1,\*</sup>, Alexander V. Akkuratov<sup>2</sup>, Olja Simoska<sup>3</sup>, Keith J. Stevenson<sup>4</sup>

<sup>1</sup> Skolkovo Institute of Science and Technology, Bolshoy Boulevard 30, bld. 1, Moscow, 121205, Russian Federation; [elena.romadina@skoltech.ru](mailto:elena.romadina@skoltech.ru)

<sup>2</sup> Federal Research Center of Problems of Chemical Physics and Medicinal Chemistry of Russian Academy of Sciences, Semenov Prospect 1, Chernogolovka, Moscow region, 142432, Russian Federation; [akkuratow@yandex.ru](mailto:akkuratow@yandex.ru)

<sup>3</sup> Department of Chemistry and Biochemistry, University of South Carolina, 631 Sumter Street, Columbia, South Carolina 29208, United States; [osimoska@mailbox.sc.edu](mailto:osimoska@mailbox.sc.edu)

<sup>4</sup> Lomonosov Moscow State University, Chemistry Department, Leninskiye Gory 1/3, Moscow 119991, Russian Federation; [kjsaustin@msn.com](mailto:kjsaustin@msn.com)

\* Correspondence: [elena.romadina@skoltech.ru](mailto:elena.romadina@skoltech.ru)

\* Corresponding author E-mail address: [Elena.Romadina@skoltech.ru](mailto:Elena.Romadina@skoltech.ru)

## Table of contents

|                                                                                                                                  |    |
|----------------------------------------------------------------------------------------------------------------------------------|----|
| 1. Literature review.....                                                                                                        | 4  |
| 2. Experimental methods.....                                                                                                     | 7  |
| 2.1. NMR characterization .....                                                                                                  | 7  |
| 2.2. Melting point determination .....                                                                                           | 9  |
| 2.3. H-cell tests.....                                                                                                           | 9  |
| 2.4. Redox flow battery tests .....                                                                                              | 9  |
| 3. CVs of the background electrolytes .....                                                                                      | 10 |
| 4. CV curves of M1 in different supporting electrolytes (long potential range).....                                              | 10 |
| 5. Pourbaix diagrams .....                                                                                                       | 11 |
| 6. Pourbaix diagrams: reference electrodes calibration.....                                                                      | 12 |
| 7. Pourbaix diagrams: proposed electrochemical mechanism and DFT calculations.....                                               | 12 |
| 8. Determination of the diffusion coefficient for M1 in 0.5 M KOH from the RDE measurements .....                                | 15 |
| 9. Determination of the diffusion coefficient for M1 in 0.5 M NaCl from the RDE measurements.....                                | 16 |
| 10. Determination of the diffusion coefficient for M1 in 0.5 M H <sub>2</sub> SO <sub>4</sub> from the RDE measurements.....     | 17 |
| 11. Determination of the standard rate constant for the M1 in 1.0 M KOH by RDE studies and Koutecký-Levich analysis.....         | 18 |
| 12. Determination of the standard rate constant for the M1 in 0.5 M NaCl by RDE studies and Koutecký-Levich analysis.....        | 19 |
| 13. Membrane resistance measurements.....                                                                                        | 20 |
| 14. CV of M1 and TEMPOL in neutral conditions.....                                                                               | 21 |
| 15. Investigation of the h-cell with Nafion 117 membrane in neutral conditions.....                                              | 22 |
| 16. Investigation of the h-cell with Fumasept FAA-3PK-130 membrane in neutral conditions .....                                   | 23 |
| 17. Investigation of the h-cell with Neosepta AHA membrane in neutral conditions.....                                            | 24 |
| 18. Investigation of the RFB based on M1 anolyte in neutral conditions.....                                                      | 25 |
| 19. Investigation of the long cycling stability of the RFB based on M1 anolyte in neutral conditions.....                        | 26 |
| 20. CV of M1 and K <sub>4</sub> Fe(CN) <sub>6</sub> in base conditions .....                                                     | 27 |
| 21. Investigation of the h-cell based on M1 anolyte in basic conditions upon potentiostatic cycling.....                         | 28 |
| 22. Investigation of the h-cell based on M1 anolyte in basic conditions upon mixed potentiostatic + galvanostatic cycling .....  | 29 |
| 23. Investigation of the h-cell based on M1 anolyte in acidic conditions upon potentiostatic cycling.....                        | 30 |
| 24. Investigation of the h-cell based on M1 anolyte in acidic conditions upon mixed potentiostatic + galvanostatic cycling ..... | 31 |

|                                                                                                                         |    |
|-------------------------------------------------------------------------------------------------------------------------|----|
| 25. Investigation of the h-cell based on M1 anolyte in acidic conditions under different charge-discharge currents..... | 32 |
| 26. Investigation of the cycling stability of the RFB with Neosepta AHA membrane in acidic conditions. 34               |    |
| 27. Investigation of the long cycling stability of the RFB with Neosepta AHA membrane in acidic conditions.....         | 35 |
| References .....                                                                                                        | 36 |

# 1. Literature review

**Table S1.** Summary of the investigated phenazine-based compounds, their solubilities, and literature references (SE = supporting electrolyte).

| Compound                                                                            | Code       | Tested in | Solubility                                                                              | Redox potential vs. Ag/AgCl (for water-based systems) | Best redox flow battery test                                                                                                                                    | Reference |
|-------------------------------------------------------------------------------------|------------|-----------|-----------------------------------------------------------------------------------------|-------------------------------------------------------|-----------------------------------------------------------------------------------------------------------------------------------------------------------------|-----------|
| 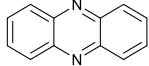   | -          | MeCN      | 6.8×10 <sup>-5</sup> M in pure water                                                    | -1.5 V vs. Ag/Ag <sup>+</sup>                         | -                                                                                                                                                               | [S1,S2]   |
|    | M1         | MeCN      | 2.2 M in MeCN<br>1.0 M in 5.0 M TBABF <sub>4</sub> in MeCN                              | -1.72 V vs. Ag/Ag <sup>+</sup>                        | Anolyte – M1<br>Catholyte – triarylamine derivative<br>Concentration - 0.01 M (50 cycles)<br>SE – 0.1 M TBABF <sub>4</sub>                                      | [S3]      |
|    | BR-5       | water     | 0.1 M in 1.0 M H <sub>2</sub> SO <sub>4</sub><br>0.054 M in 4.0 M methanesulfonic acid  | 0.0 V                                                 | Anolyte - d-BR-5<br>Catholyte - Ce(CH <sub>3</sub> SO <sub>3</sub> ) <sub>3</sub><br>Concentration - 0.05 M (200 cycles)<br>SE - 4.0 M methanesulfonic acid     | [S4,S5]   |
|    | d-BR-5     |           | 0.34 M in 1.0 M H <sub>2</sub> SO <sub>4</sub><br>0.206 M in 4.0 M methanesulfonic acid | -0.013 V                                              |                                                                                                                                                                 |           |
|    | BR-5- TfOH |           | 0.11 M in 1.0 M H <sub>2</sub> SO <sub>4</sub><br>0.175 M in 4.0 M methanesulfonic acid | -0.012 V                                              |                                                                                                                                                                 |           |
|   | DHP        |           | 0.1 M in 1.0 M NaOH                                                                     | -1.02 V                                               |                                                                                                                                                                 |           |
|  | DHPC       |           | 0.95 M in 1.0 M NaOH                                                                    | -1.06 V                                               |                                                                                                                                                                 |           |
|  | DHPS       |           | 1.45 M in 1.0 M NaOH                                                                    | -1.08 V                                               | Anolyte – DHPS<br>Catholyte – K <sub>4</sub> Fe(CN) <sub>6</sub><br>Concentration - 0.1 M (200 cycles)<br>Concentration – 1.4 M (500 cycles)<br>SE - 1.0 M NaOH | [S1]      |

|                                                                                                                                                                                                                                                                                                                                                                                                                                                   |                                                                                                          |       |                                       |                                                                                                                                                                                    |                                                                                                                                                                                                        |      |
|---------------------------------------------------------------------------------------------------------------------------------------------------------------------------------------------------------------------------------------------------------------------------------------------------------------------------------------------------------------------------------------------------------------------------------------------------|----------------------------------------------------------------------------------------------------------|-------|---------------------------------------|------------------------------------------------------------------------------------------------------------------------------------------------------------------------------------|--------------------------------------------------------------------------------------------------------------------------------------------------------------------------------------------------------|------|
| 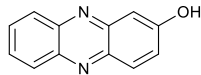                                                                                                                                                                                                                                                                                                                                                                 | HP                                                                                                       | water | 1.70 M in 1.0 M KOH                   | -0.88 V                                                                                                                                                                            | Anolyte – BHPC<br>Catholyte – K <sub>4</sub> Fe(CN) <sub>6</sub><br>Concentration - 0.5 M (1305 cycles)<br>SE - 1.0 M KOH                                                                              | [S6] |
|                                                                                                                                                                                                                                                                                                                                                                  | AHP                                                                                                      |       | 0.43 M in 1.0 M KOH                   | -0.99 V                                                                                                                                                                            |                                                                                                                                                                                                        |      |
|                                                                                                                                                                                                                                                                                                                                                                  | BHPC                                                                                                     |       | 1.55 M in 1.0 M KOH                   | -0.99 V                                                                                                                                                                            |                                                                                                                                                                                                        |      |
|  <p>R selected from:</p>     | 2,7-DGAP<br>2,7-DAAP<br>2,7-DPAP<br>2,7-DBAP<br>1,8-DGAP<br>1,6-DGAP<br>1,6-DAAP<br>1,6-DPAP<br>1,6-DBAP | water | From 1.047 M to 0.401 M in pure water | 2,7-DGAP - 0.73 V<br>2,7-DAAP - 0.75 V<br>2,7-DPAP -0.73 V<br>2,7-DBAP -0.74 V<br>1,8-DGAP -0.78 V<br>1,6-DGAP -0.73 V<br>1,6-DAAP -0.72 V<br>1,6-DPAP -0.77 V<br>1,6-DBAP -0.74 V | Anolyte – 1,6-DPAP<br>Catholyte – K <sub>4</sub> Fe(CN) <sub>6</sub><br><br>Concentration - 0.1 M (192 cycles)<br>SE - 1.0 M KCl pH=12<br><br>Concentration – 0.5 M (70 cycles)<br>SE - 1.0 M KCl pH=8 | [S7] |
|                                                                                                                                                                                                                                                                                                                                                                  | 1,6-PFP                                                                                                  | water | 1.01 M in 1.0 M KOH                   | -0.77 V                                                                                                                                                                            | Anolyte – 1,8-PFP<br>Catholyte – K <sub>4</sub> Fe(CN) <sub>6</sub><br>Concentration - 0.1 M (340 cycles)<br>SE - 1.0 M KOH                                                                            | [S8] |
|                                                                                                                                                                                                                                                                                                                                                                                                                                                   |                                                                                                          |       | 1.02 M in pure water                  |                                                                                                                                                                                    |                                                                                                                                                                                                        |      |
|                                                                                                                                                                                                                                                                                                                                                                 | 1,8-PFP                                                                                                  |       | 1.46 M in 1.0 M KOH                   | -0.78 V                                                                                                                                                                            |                                                                                                                                                                                                        |      |
|                                                                                                                                                                                                                                                                                                                                                                                                                                                   |                                                                                                          |       | 1.09 M in pure water                  |                                                                                                                                                                                    |                                                                                                                                                                                                        |      |
|                                                                                                                                                                                                                                                                                                                                                                | 2,7-PFP                                                                                                  |       | 0.84 M in 1.0 M KOH                   | -0.82 V                                                                                                                                                                            |                                                                                                                                                                                                        |      |
|                                                                                                                                                                                                                                                                                                                                                                                                                                                   |                                                                                                          |       | 0.79 M in pure water                  |                                                                                                                                                                                    |                                                                                                                                                                                                        |      |

|                                                                                     |         |                 |                                |         |                                                                                                                                                                                                                                                                    |       |
|-------------------------------------------------------------------------------------|---------|-----------------|--------------------------------|---------|--------------------------------------------------------------------------------------------------------------------------------------------------------------------------------------------------------------------------------------------------------------------|-------|
| 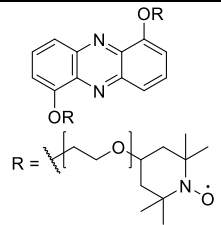   | -       | water + diglyme | -                              | -0.62 V | Anolyte – compound itself<br>Catholyte – compound itself<br>Concentration - 0.01 M (1800 cycles)<br>SE – 0.5 M NaCl                                                                                                                                                | [S9]  |
|    | 1,3-DHP | water           | 0.3 M 1M NaOH<br>1.6 M 2M KOH  | -0.81 V | Anolyte – 1,4-DHP<br>Catholyte – K <sub>4</sub> Fe(CN) <sub>6</sub><br>Concentration - 0.42 M (1000 cycles)<br>SE - 2.0 M KOH<br><br>Anolyte – 1,6-DHP<br>Catholyte – K <sub>4</sub> Fe(CN) <sub>6</sub><br>Concentration - 0.36 M (1000 cycles)<br>SE - 2.0 M KOH | [S10] |
|    | 1,4-DHP |                 | 0.3 M 1M NaOH<br>0.5 M 2M KOH  | -0.72 V |                                                                                                                                                                                                                                                                    |       |
|    | 1,6-DHP |                 | 0.07 M 1M NaOH<br>0.6 M 2M KOH | -0.91 V |                                                                                                                                                                                                                                                                    |       |
|    | 1,8-DHP |                 | 1.8 M 1M NaOH<br>1.9 M 2M KOH  | -1.02 V |                                                                                                                                                                                                                                                                    |       |
|   | 1,9-DHP |                 | 0.1 M 1M NaOH<br>0.3 M 2M KOH  | -0.81 V |                                                                                                                                                                                                                                                                    |       |
|  | 2,3-DHP |                 | 1.6 M 1M NaOH<br>2.0 M 2M KOH  | -1.06 V |                                                                                                                                                                                                                                                                    |       |
|  | 2,7-DHP |                 | 0.1 M 1M NaOH<br>0.2 M 2M KOH  | -0.96 V |                                                                                                                                                                                                                                                                    |       |

## 2. Experimental methods

### 2.1. NMR characterization

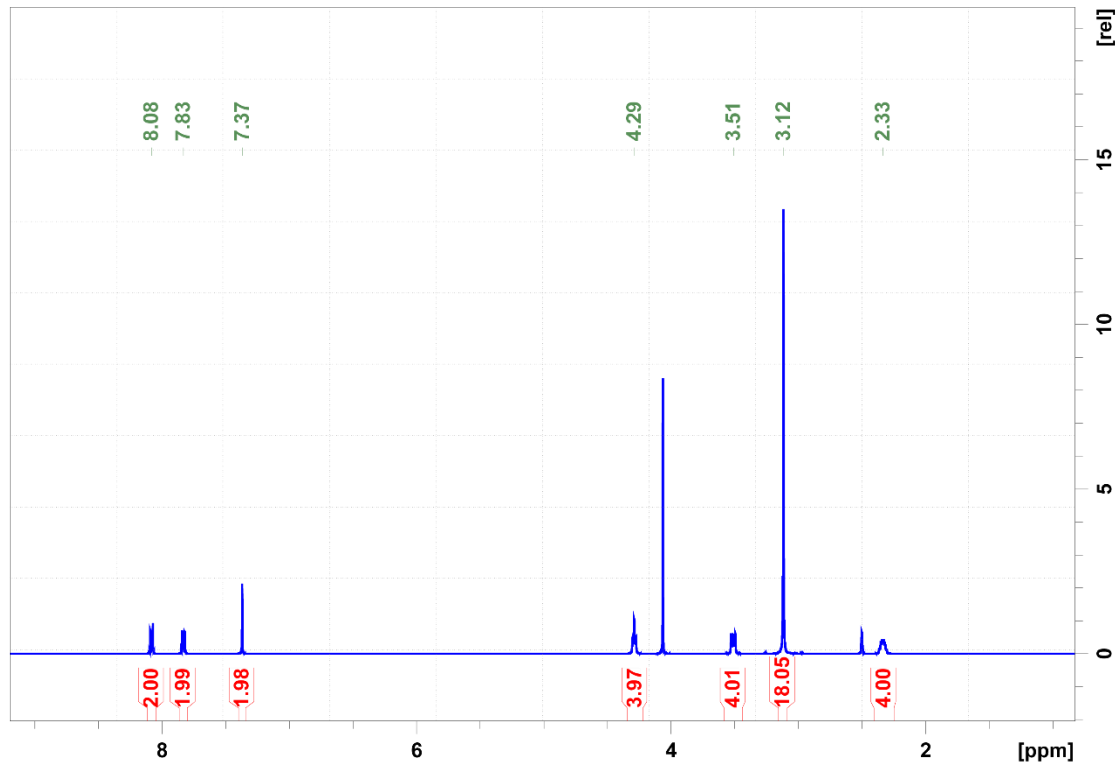

Figure S1. Full  $^1\text{H}$  NMR spectrum of **M1** compound.

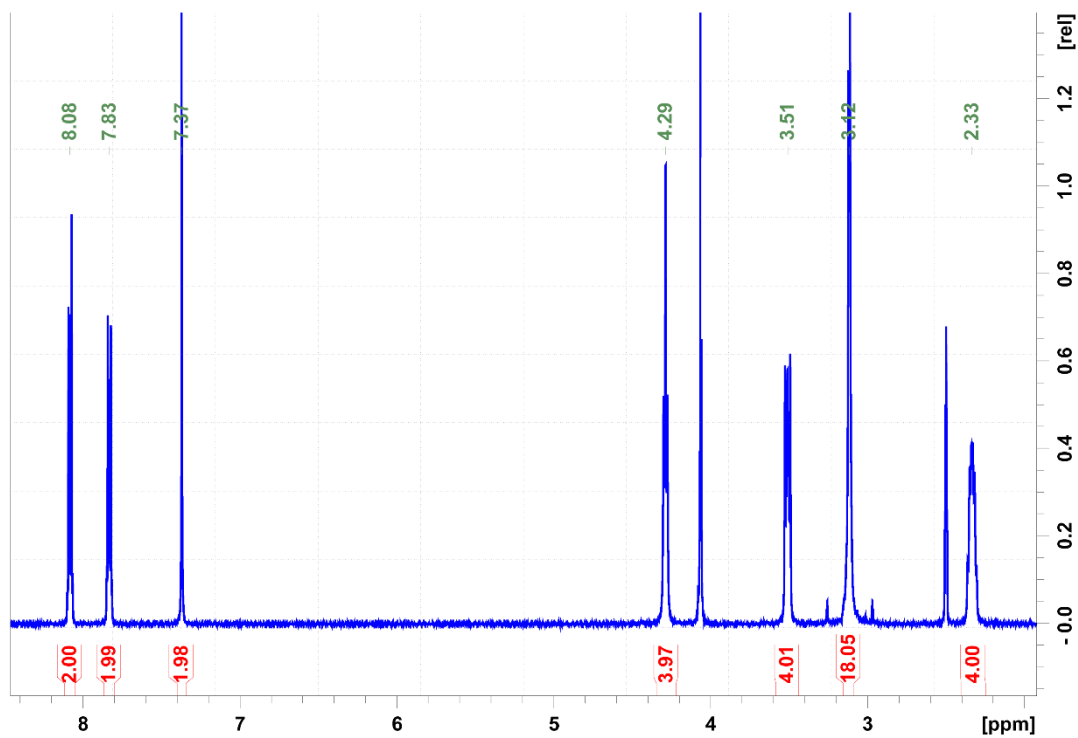

Figure S2. Zoomed  $^1\text{H}$  NMR spectrum of **M1** compound.

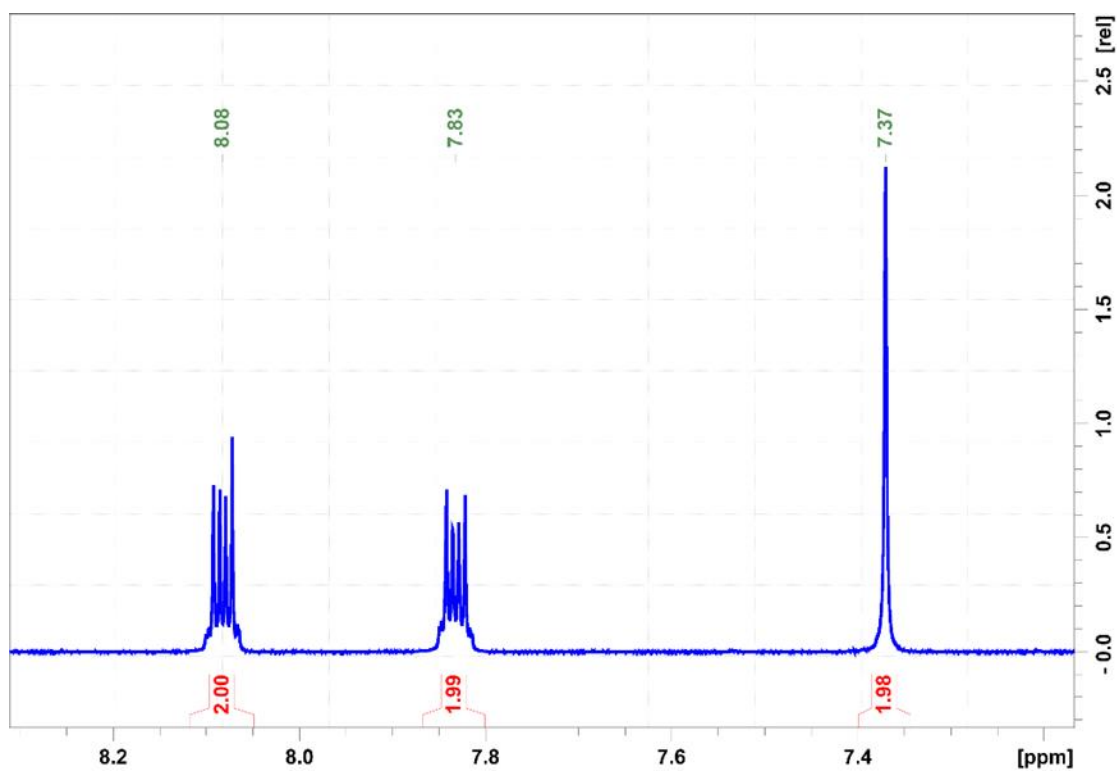

Figure S3. Aromatic region of  $^1\text{H}$  NMR spectrum of M1 compound.

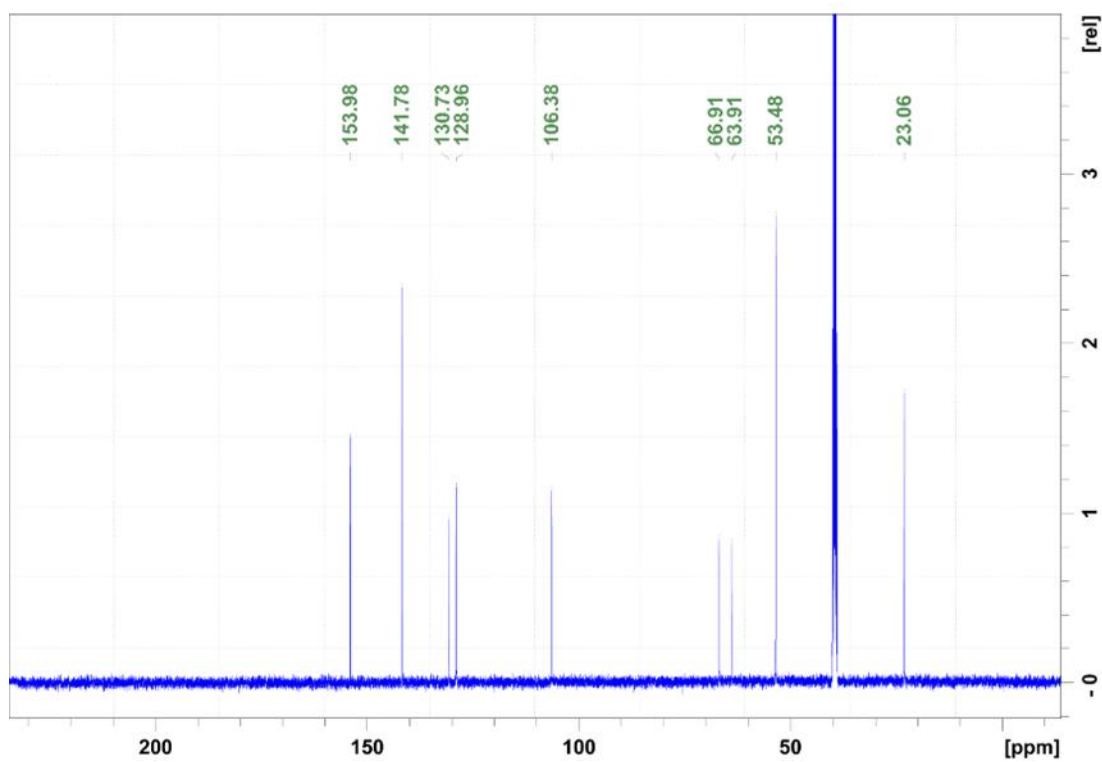

Figure S4.  $^{13}\text{C}$  NMR spectrum of M1 compound.



## 2.2. Melting point determination

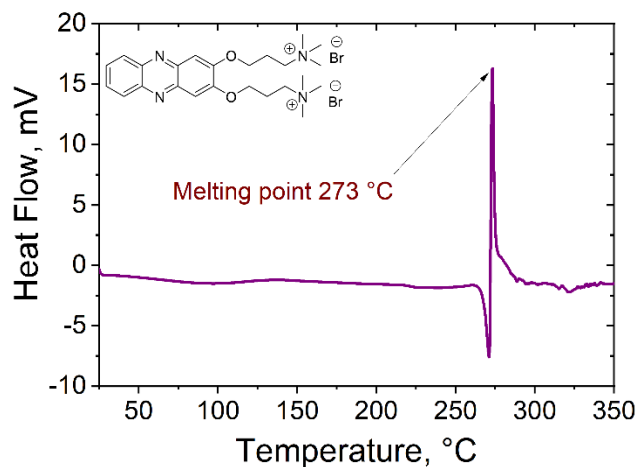

Figure S5. Differential scanning calorimetry graph for **M1** compound.

## 2.3. H-cell tests

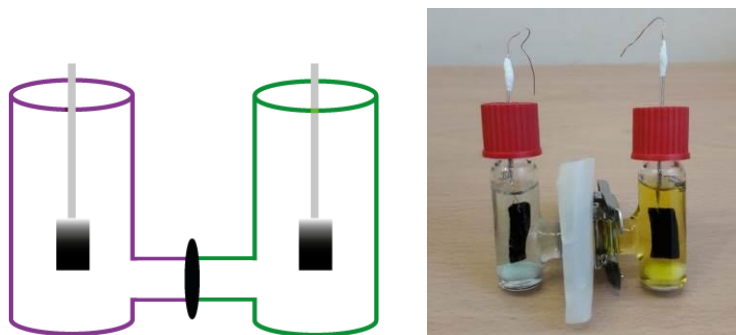

Figure S6. Schematic representation and photo of the h-cell used.

## 2.4. Redox flow battery tests

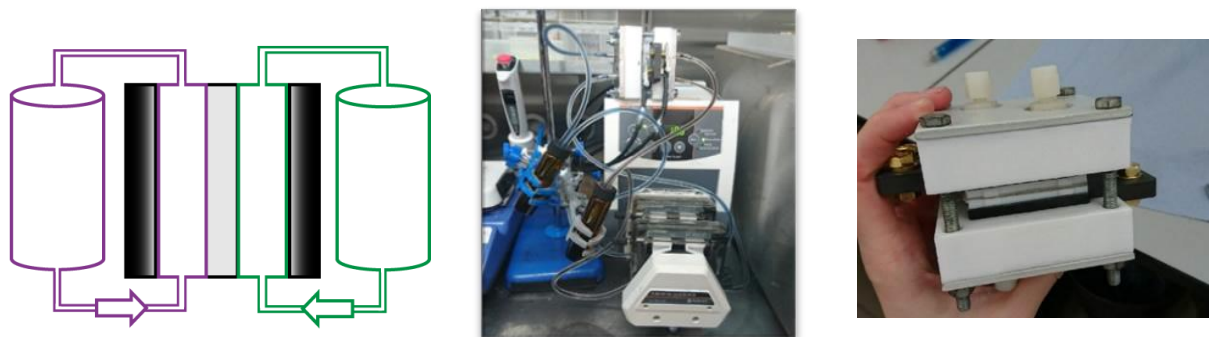

**Figure S7.** Schematic representation of the redox flow battery and the photos of a laboratory setup. The redox flow cell consisted of metal cell frames, Teflon cell frames, graphite/Teflon (20/80) current collectors, Teflon flow frames with graphite felt electrodes (6 mm thick graphite felt, geometric active area of 4.00 cm<sup>2</sup>), and Neosepta AHA anion-exchange membrane.

### 3. CVs of the background electrolytes

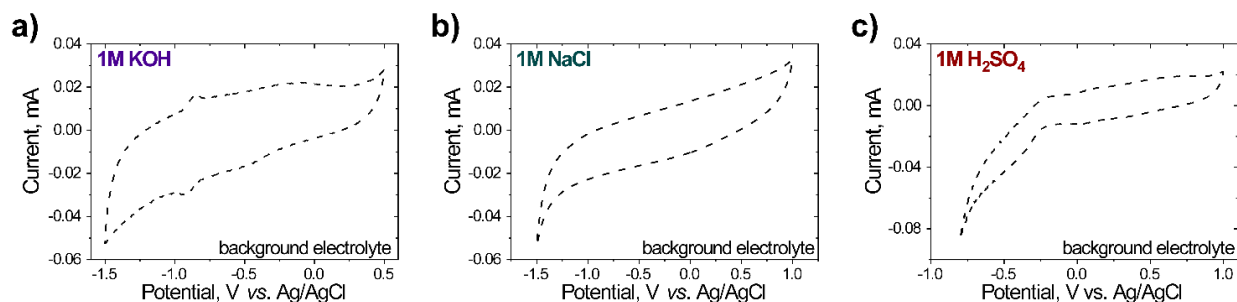

**Figure S8.** Cyclic voltammogram of the background electrolytes: (a) 1.0 M KOH, (b) 1.0 M NaCl and (c) 1.0 M H<sub>2</sub>SO<sub>4</sub>.

### 4. CV curves of M1 in different supporting electrolytes (long potential range)

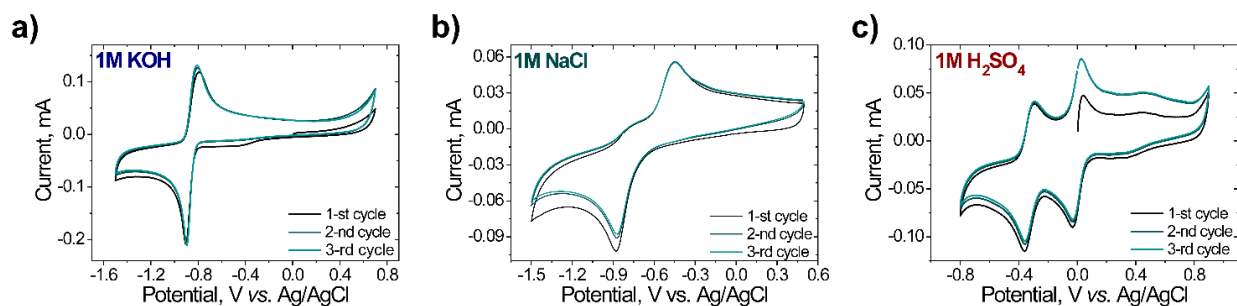

**Figure S9.** Cycling voltammograms were obtained for 30.0 mM aqueous solution of M1 with (a) 1.0 M KOH, (b) 1.0 M NaCl and (c) 1.0 M H<sub>2</sub>SO<sub>4</sub> as supporting electrolytes at a scan rate of 100 mV s<sup>-1</sup>.

## 5. Pourbaix diagrams

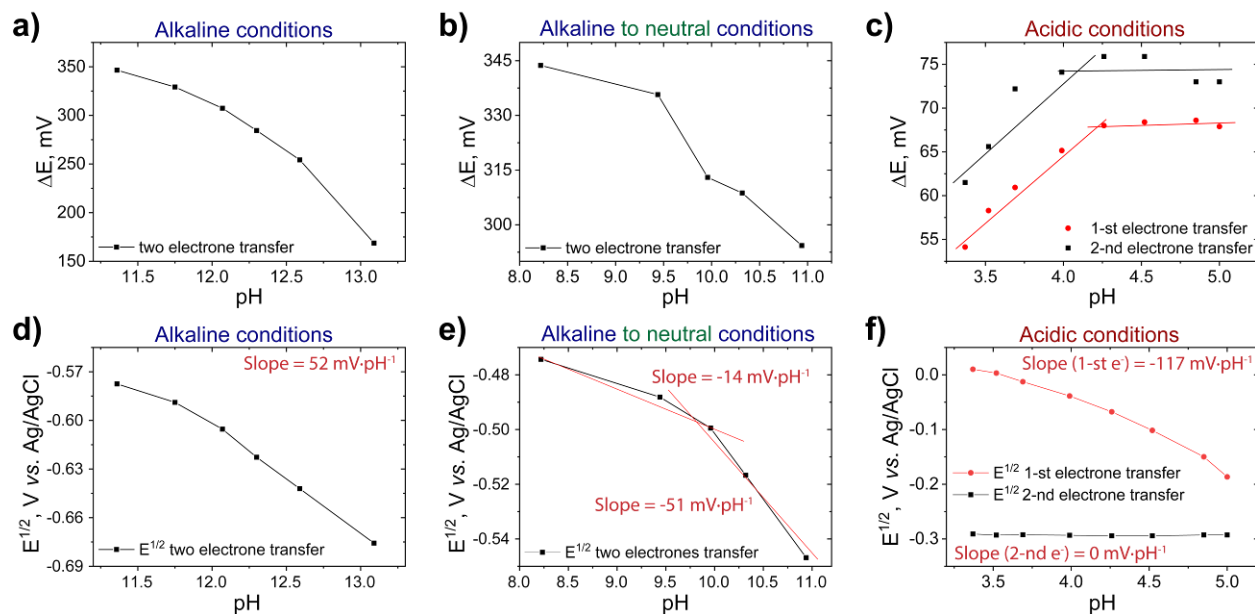

**Figure S10.** Dependence of peak splitting ( $\Delta E$ ) of the pH for **M1** in alkaline (**f**), alkaline to neutral (**b**) and acidic (**c**) conditions. Dependence of half-wave potential ( $E^{1/2}$ ) of the pH for the alkaline (**d**), alkaline to neutral (**e**) and acidic (**f**) conditions.

## 6. Pourbaix diagrams: reference electrodes calibration

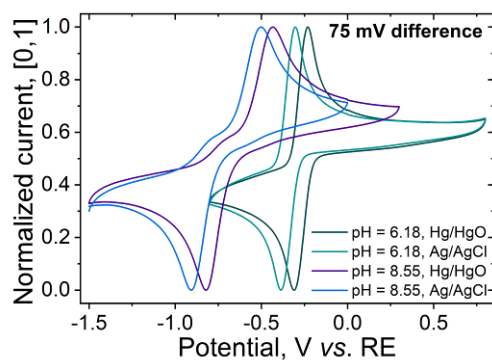

**Figure S11.** Calibration of Hg/HgO electrode vs. Ag/AgCl electrode. CV curves are measured for the **M1** compound at 100 mV s<sup>-1</sup> scan rate at different pH values.

## 7. Pourbaix diagrams: proposed electrochemical mechanism and DFT calculations

### Acidic conditions

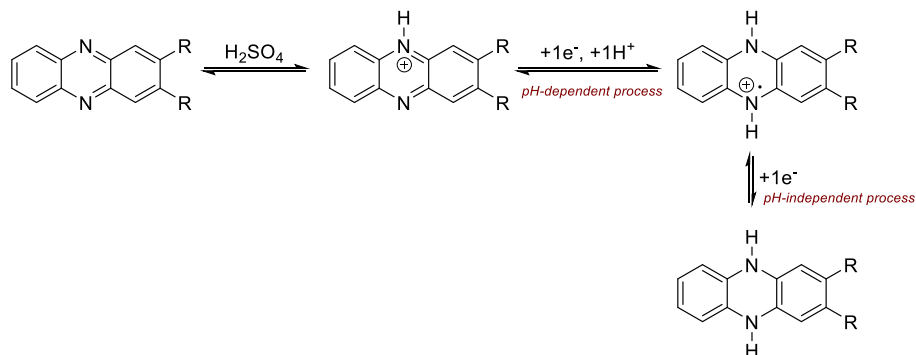

### Neutral conditions

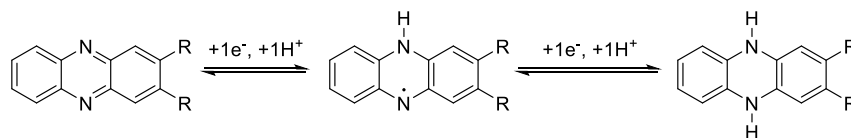

### Basic conditions

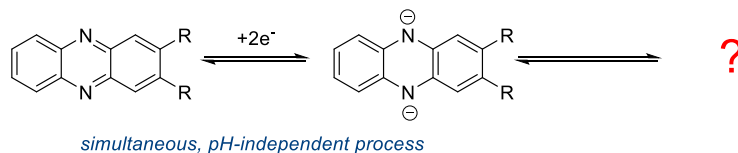

**Figure S6.** Proposed mechanism and thermodynamically favored protonation pathway for **M1** at acidic, neutral, and alkaline conditions.

## DFT calculations - Neutral conditions

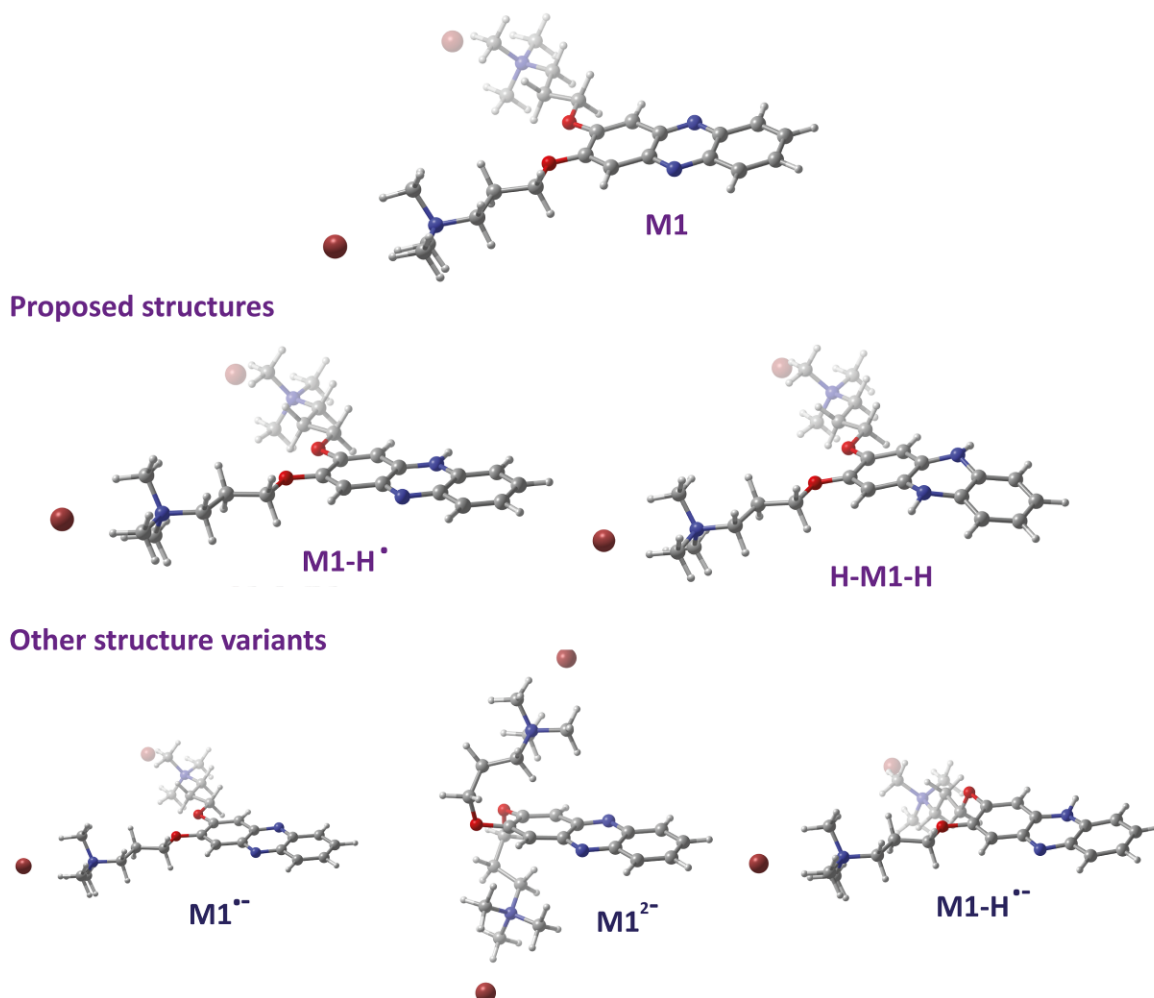

**Figure S13.** Optimised structures for **M1** molecule, reduced **M1-H<sup>•</sup>** molecule (+ 1e<sup>-</sup> + 1H<sup>+</sup>), reduced **H-M1-H** molecule (+ 2e<sup>-</sup> + 2H<sup>+</sup>) and other theoretically possible structure variants.

**Table S2.** Calculated and measured redox potentials for the **M1** reduction in neutral conditions.

| Redox process                                                       | $\text{M1} + \text{e}^- + \text{H}^+ \rightarrow \text{M1-H}^\bullet$ | $\text{M1-H}^\bullet + \text{e}^- + \text{H}^+ \rightarrow \text{H-M1-H}$ |
|---------------------------------------------------------------------|-----------------------------------------------------------------------|---------------------------------------------------------------------------|
| Calculated redox potential (V) vs. NHE                              | -0.446 V                                                              | -0.065 V                                                                  |
| Measured redox potential (V) vs. NHE 1M NaCl Supporting electrolyte | -0.460 V                                                              |                                                                           |

**Table S3.** Calculated redox potentials for other possible redox reaction for the **M1** reduction in neutral conditions.

| Redox process                        | $\text{M1} + \text{e}^- \rightarrow \text{M1}^{\bullet-}$ | $\text{M1} + 2\text{e}^- \rightarrow \text{M1}^{2\bullet-}$ | $\text{M1} + 2\text{e}^- + \text{H}^+ \rightarrow \text{M1-H}^\bullet$ |
|--------------------------------------|-----------------------------------------------------------|-------------------------------------------------------------|------------------------------------------------------------------------|
| Computed Reduction Potential vs. NHE | -2.615 V                                                  | -3.942 V                                                    | -1.422 V                                                               |

# DFT calculations - Acidic conditions

M1-H<sup>+</sup>

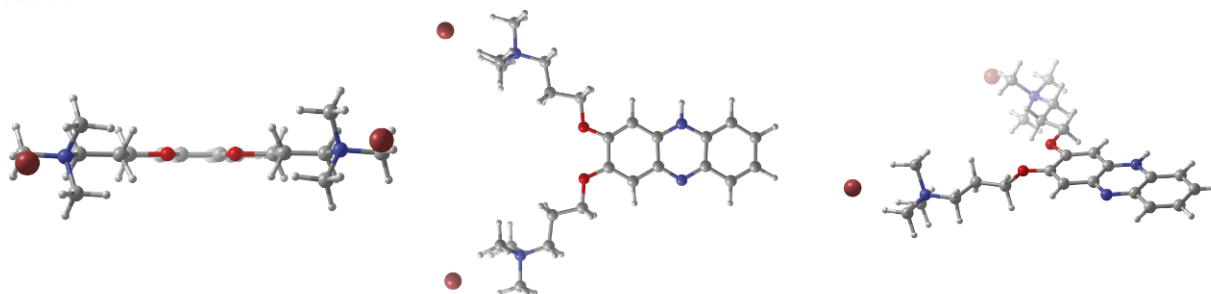

H-M1-H<sup>+</sup>

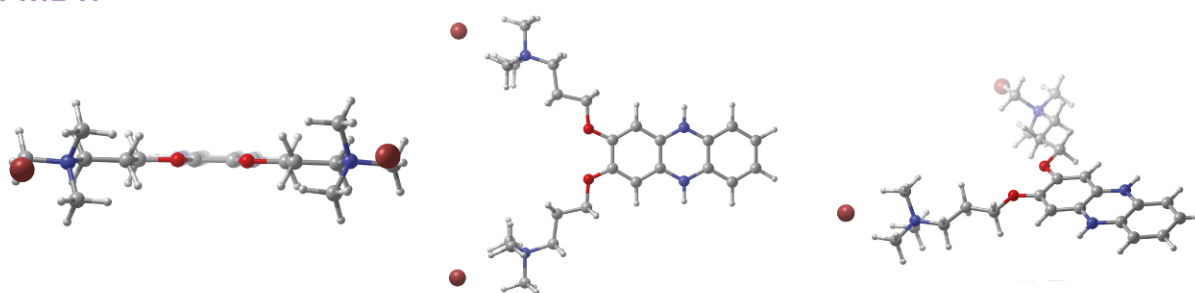

H-M1-H

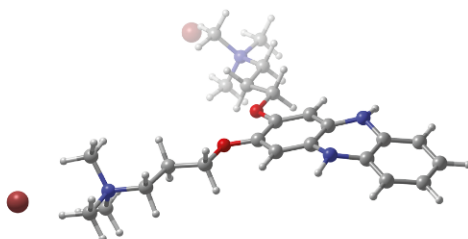

**Figure S14.** Optimised structures for **M1-H<sup>+</sup>** molecule, reduced **M1-H<sup>•</sup>** molecule (+ 1e<sup>-</sup> + 1H<sup>+</sup>), and reduced **H-M1-H** molecule (+ 2e<sup>-</sup> + 2H<sup>+</sup>).

**Table S4.** Calculated and measured redox potentials for the **M1** reduction in acidic conditions.

| Redox process                                                      | M1-H <sup>+</sup> + e <sup>-</sup> + H <sup>+</sup> → H-M1-H <sup>•</sup> | H-M1-H <sup>•</sup> + e <sup>-</sup> → H-M1-H |
|--------------------------------------------------------------------|---------------------------------------------------------------------------|-----------------------------------------------|
| Computed Reduction Potential vs. NHE                               | 0.298 V                                                                   | -0.073 V                                      |
| Measured redox potential vs. NHE 1M H <sub>2</sub> SO <sub>4</sub> | 0.26 V                                                                    | -0.05V                                        |

## 8. Determination of the diffusion coefficient for M1 in 0.5 M KOH from the RDE measurements

The diffusion coefficient was calculated according to Levich equation for rotation disk electrode measurements. The kinematic viscosity for 0.5 M KOH solution is  $1.03 \times 10^{-2} \text{ cm}^2 \text{ s}^{-1}$  [S11].

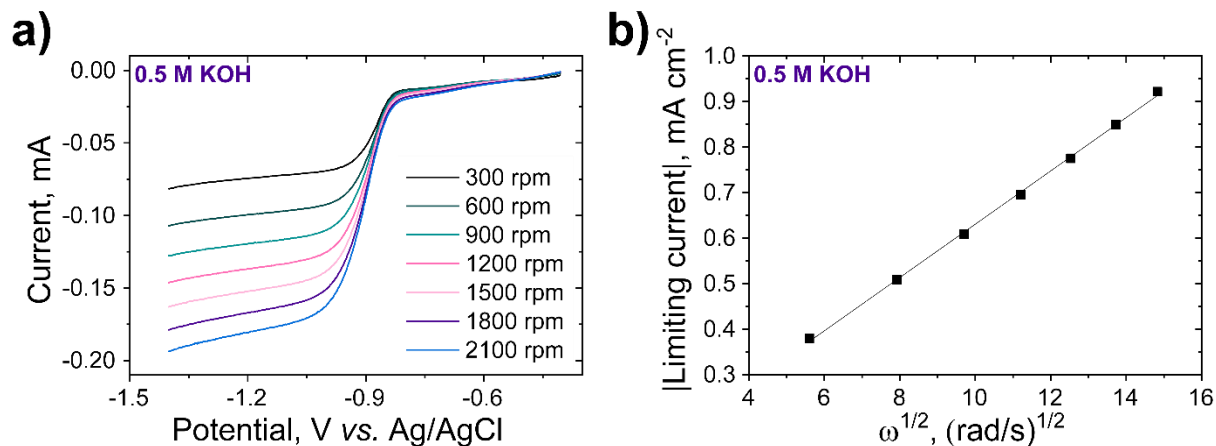

**Figure S15.** Linear sweep voltammetry test with a glassy carbon rotating disk electrode for **M1** in 0.5 M KOH supporting electrolyte at a scan rate of  $10 \text{ mV s}^{-1}$  (a), and linear plot of the current as a function of the square root of the rotation rate ( $\omega$ ) (b). Concentration of the redox-active compound was 15.0 mM.

**Table S5.** Data set used for limiting current - square root of the rotation rate plot and evaluation of diffusion coefficient.

| $\omega$ , rpm | $\omega$ , $\text{rad s}^{-1}$ | Limiting current, mA (at -1.2 V) |
|----------------|--------------------------------|----------------------------------|
| 300            | 31.41                          | -0.0745                          |
| 600            | 62.83                          | -0.0998                          |
| 900            | 94.25                          | -0.1195                          |
| 1200           | 125.66                         | -0.1364                          |
| 1500           | 157.08                         | -0.1521                          |
| 1800           | 188.49                         | -0.1668                          |
| 2100           | 219.91                         | -0.1809                          |

The slopes were found to be:

| Electron             | Slope                 | Error                 |
|----------------------|-----------------------|-----------------------|
| 2 electron reduction | $5.85 \times 10^{-2}$ | $7.68 \times 10^{-4}$ |

Diffusion coefficient is:

|           | 2 e <sup>-</sup> reduction                    |
|-----------|-----------------------------------------------|
| 0.5 M KOH | $1.94 \times 10^{-6} \pm 2.93 \times 10^{-9}$ |

## 9. Determination of the diffusion coefficient for M1 in 0.5 M NaCl from the RDE measurements

The diffusion coefficient was calculated according to Levich equation for rotation disk electrode measurements. The kinematic viscosity for 0.5 M NaCl solution is  $0.010 \text{ cm}^2 \text{ s}^{-1}$  [ S6].

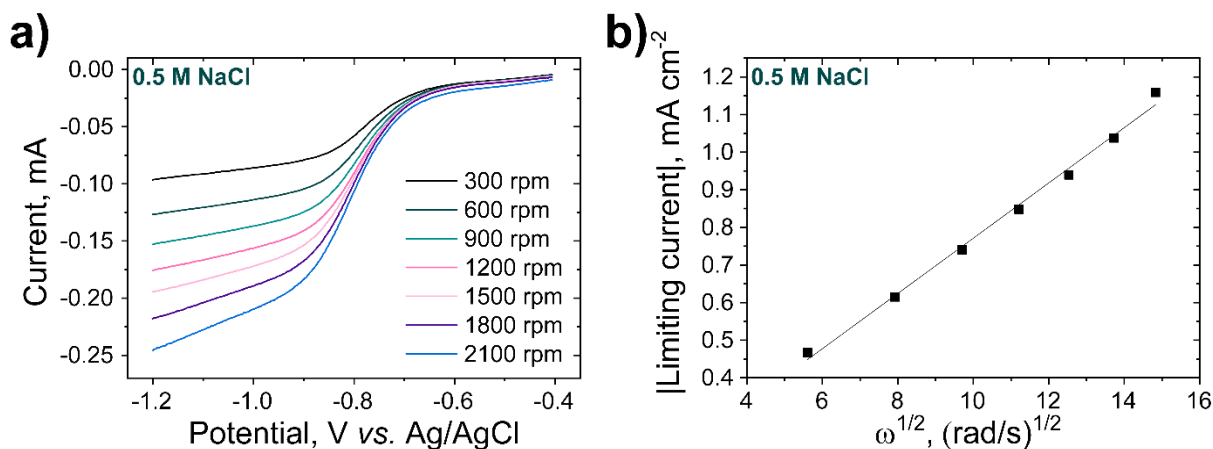

**Figure S16.** Linear sweep voltammetry test with a glassy carbon rotating disk electrode for **M1** in 0.5 M NaCl supporting electrolyte at a scan rate of  $10 \text{ mV s}^{-1}$  (a), and linear plot of the current as a function of the square root of the rotation rate ( $\omega$ ) (b). Concentration of the redox-active compound was 15.0 mM.

**Table S6.** Data set used for limiting current - square root of the rotation rate plot and evaluation of diffusion coefficient.

| $\omega$ , rpm | $\omega$ , $\text{rad s}^{-1}$ | Limiting current, mA (at -1.1 V) |
|----------------|--------------------------------|----------------------------------|
| 300            | 31.41                          | -0.0916                          |
| 600            | 62.83                          | -0.1207                          |
| 900            | 94.25                          | -0.1453                          |
| 1200           | 125.66                         | -0.1665                          |
| 1500           | 157.08                         | -0.1844                          |
| 1800           | 188.49                         | -0.2037                          |
| 2100           | 219.91                         | -0.2275                          |

The slopes were found to be:

| Electron             | Slope                 | Error                 |
|----------------------|-----------------------|-----------------------|
| 2 electron reduction | $7.45 \times 10^{-2}$ | $2.52 \times 10^{-3}$ |

Diffusion coefficient is:

|            | 2 e <sup>-</sup> reduction                    |
|------------|-----------------------------------------------|
| 0.5 M NaCl | $9.64 \times 10^{-7} \pm 6.13 \times 10^{-9}$ |



## 10. Determination of the diffusion coefficient for M1 in 0.5 M H<sub>2</sub>SO<sub>4</sub> from the RDE measurements

The diffusion coefficient was calculated according to Levich equation for rotation disk electrode measurements. The kinematic viscosity for 0.5 M H<sub>2</sub>SO<sub>4</sub> solution is 0.0098 cm<sup>2</sup> s<sup>-1</sup> [S12].

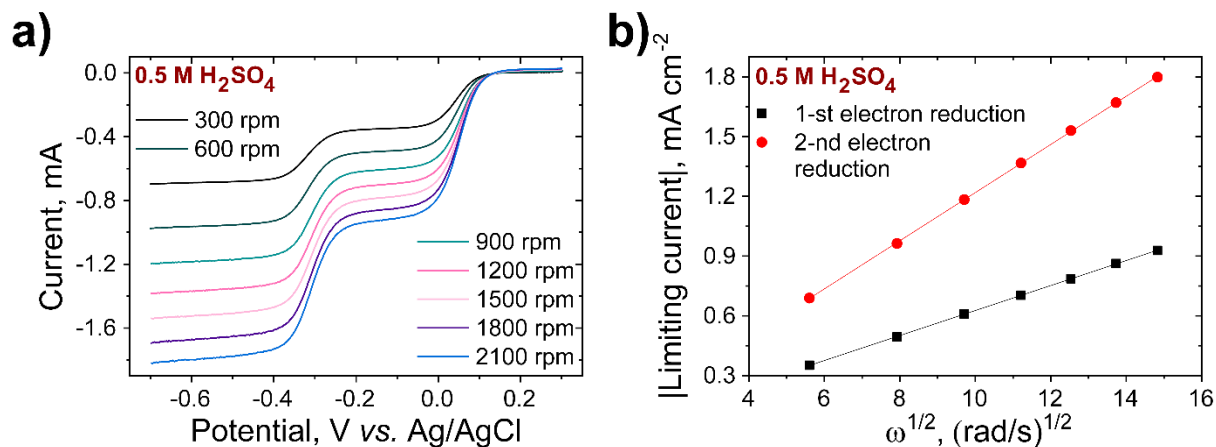

**Figure S17.** Linear sweep voltammetry test with a glassy carbon rotating disk electrode for **M1** in 0.5 M H<sub>2</sub>SO<sub>4</sub> supporting electrolyte at a scan rate of 10 mV s<sup>-1</sup> (a), and linear plots of the currents as a function of the square root of the rotation rate ( $\omega$ ) (b). Concentration of the redox-active compound was 15.0 mM.

**Table S7.** Data set used for limiting current - square root of the rotation rate plot, and evaluation of diffusion coefficient.

| $\omega$ , rpm | $\omega$ , rad s <sup>-1</sup> | Limiting current for the 1-st electron reduction, mA (at -0.15 V) | Limiting current for the 2-nd electron reduction, mA (at -0.60 V) |
|----------------|--------------------------------|-------------------------------------------------------------------|-------------------------------------------------------------------|
| 300            | 31.41                          | -0.351                                                            | -0.689                                                            |
| 600            | 62.83                          | -0.493                                                            | -0.963                                                            |
| 900            | 94.25                          | -0.609                                                            | -1.180                                                            |
| 1200           | 125.66                         | -0.703                                                            | -1.370                                                            |
| 1500           | 157.08                         | -0.786                                                            | -1.530                                                            |
| 1800           | 188.49                         | -0.862                                                            | -1.670                                                            |
| 2100           | 219.91                         | -0.927                                                            | -1.800                                                            |

The slopes were found to be:

| Electron                | Slope                 | Error                 |
|-------------------------|-----------------------|-----------------------|
| 1-st electron reduction | $6.29 \times 10^{-2}$ | $2.45 \times 10^{-4}$ |
| 2-nd electron reduction | $1.20 \times 10^{-1}$ | $4.66 \times 10^{-5}$ |

Diffusion coefficients are:

|                                      | 1-st e <sup>-</sup> reduction                  | 2-nd e <sup>-</sup> reduction                 |
|--------------------------------------|------------------------------------------------|-----------------------------------------------|
| 0.5 M H <sub>2</sub> SO <sub>4</sub> | $2.09 \times 10^{-6} \pm 5.16 \times 10^{-10}$ | $5.66 \times 10^{-6} \pm 1.35 \times 10^{-9}$ |

## 11. Determination of the standard rate constant for the M1 in 1.0 M KOH by RDE studies and Koutecký-Levich analysis

The standard electrochemical rate constant was measured by use of the Koutecký-Levich method.

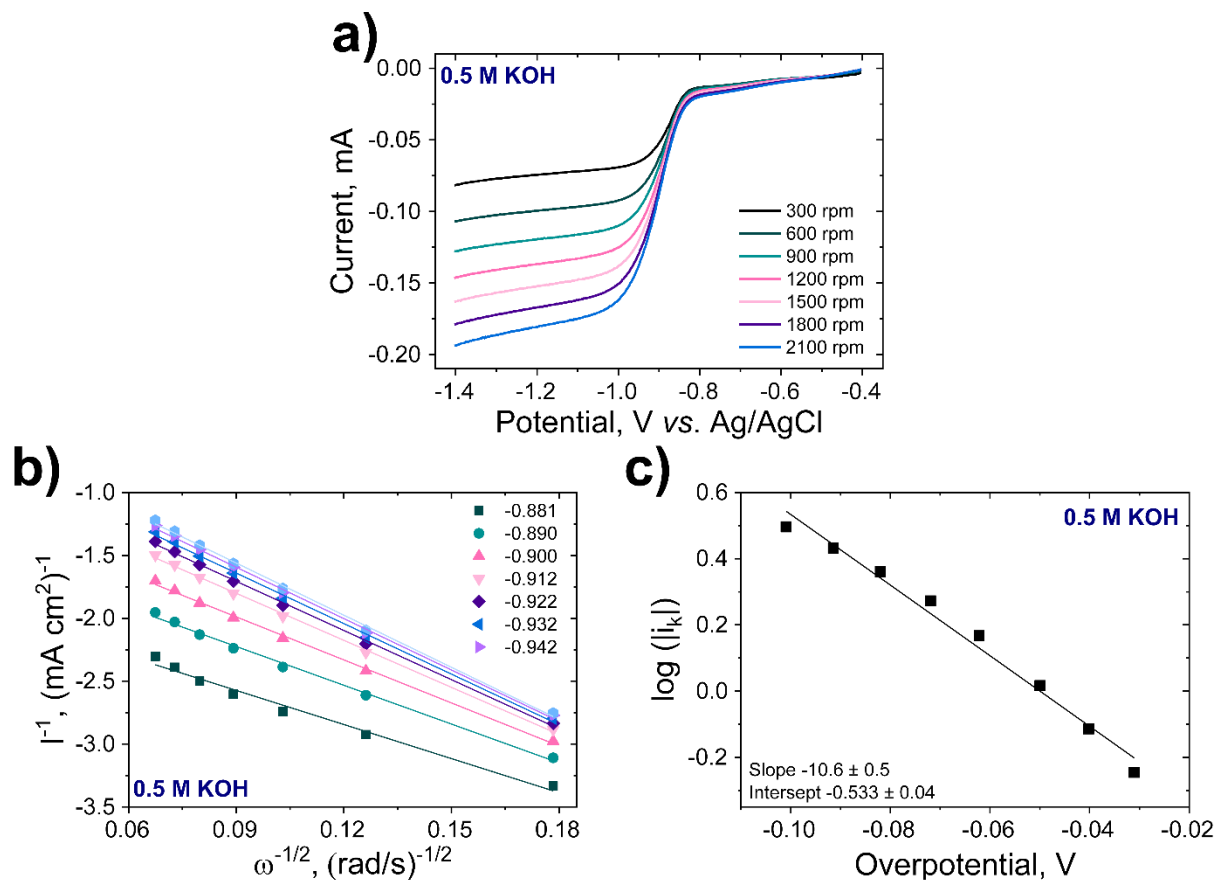

**Figure S18.** (a) Rotating disk electrode measurement of **M1** (15 mM), 0.5 M NaCl in distilled water, scan rate 10 mV s<sup>-1</sup>, rotating rates from 300 to 2100 rpm; (b) Koutecký-Levich plot for different overpotentials yielding the mass-transfer-independent current  $i_k$ ; (c) Tafel plot yielding  $k_0 = 5.16 \times 10^{-4}$  cm s<sup>-1</sup> and  $\alpha = 0.90$ .

## 12. Determination of the standard rate constant for the M1 in 0.5 M NaCl by RDE studies and Koutecký-Levich analysis

The standard electrochemical rate constant was measured by use of the Koutecký-Levich method.

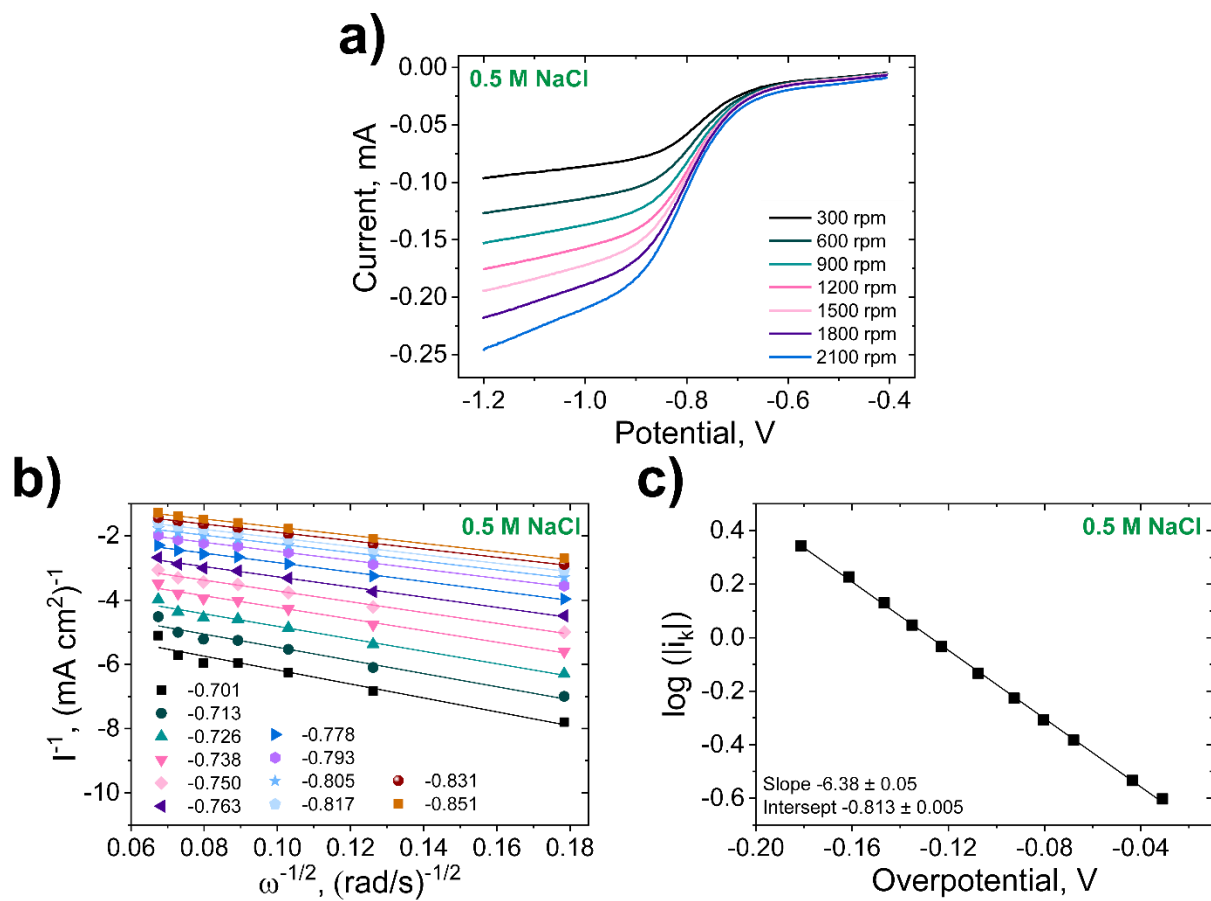

**Figure S19.** (a) Rotating disk electrode measurement of **M1** (15 mM), 0.5 M NaCl in distilled water, scan rate  $10 \text{ mV s}^{-1}$ , rotating rates from 300 to 2100 rpm; (b) Koutecký-Levich plot for different overpotentials yielding the mass-transfer-independent current  $i_k$ ; (c) Tafel plot yielding  $k_0 = 2.59 \times 10^{-4} \text{ cm s}^{-1}$  and  $\alpha = 0.94$ .

### 13. Membrane resistance measurements

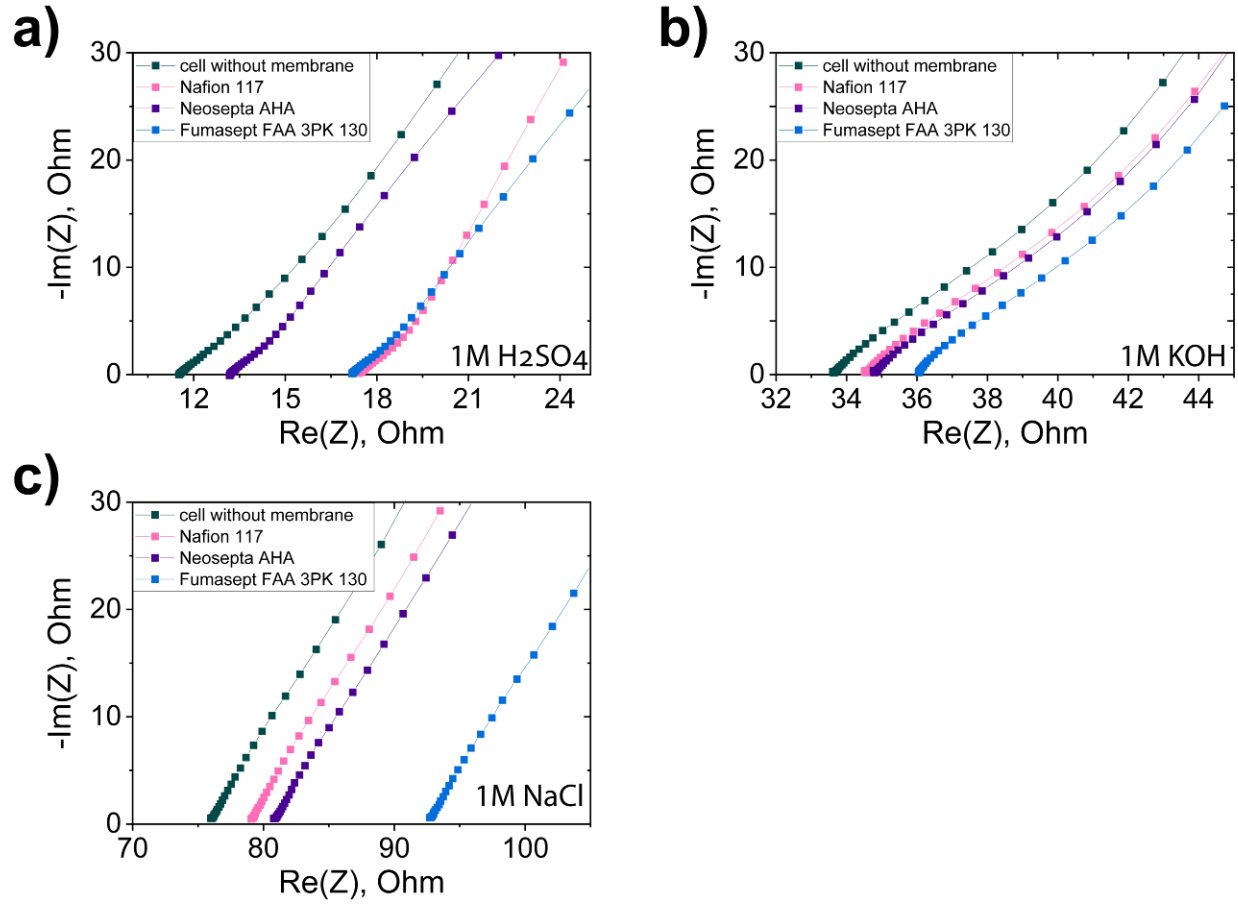

**Figure S20.** The Nyquist Plots of the non-flow cell with different membranes under with different supporting electrolytes **(a)** 1.0 M  $\text{H}_2\text{SO}_4$ , **(b)** 1.0 M KOH, **(c)** 1.0 M NaCl.

## 14. CV of M1 and TEMPOL in neutral conditions

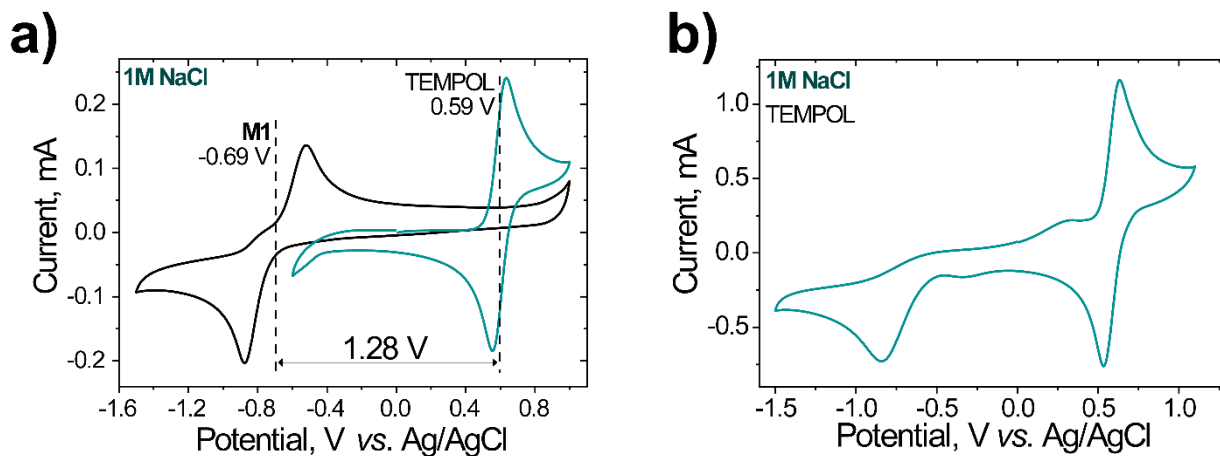

**Figure S21.** Cyclic voltammograms of pure **M1** (long potential range) and TEMPOL; **(b)** Cyclic voltammograms of pure TEMPOL (long potential range).

## 15. Investigation of the h-cell with Nafion 117 membrane in neutral conditions

### h-cell, Nafion 117 membrane, unmixed electrolytes

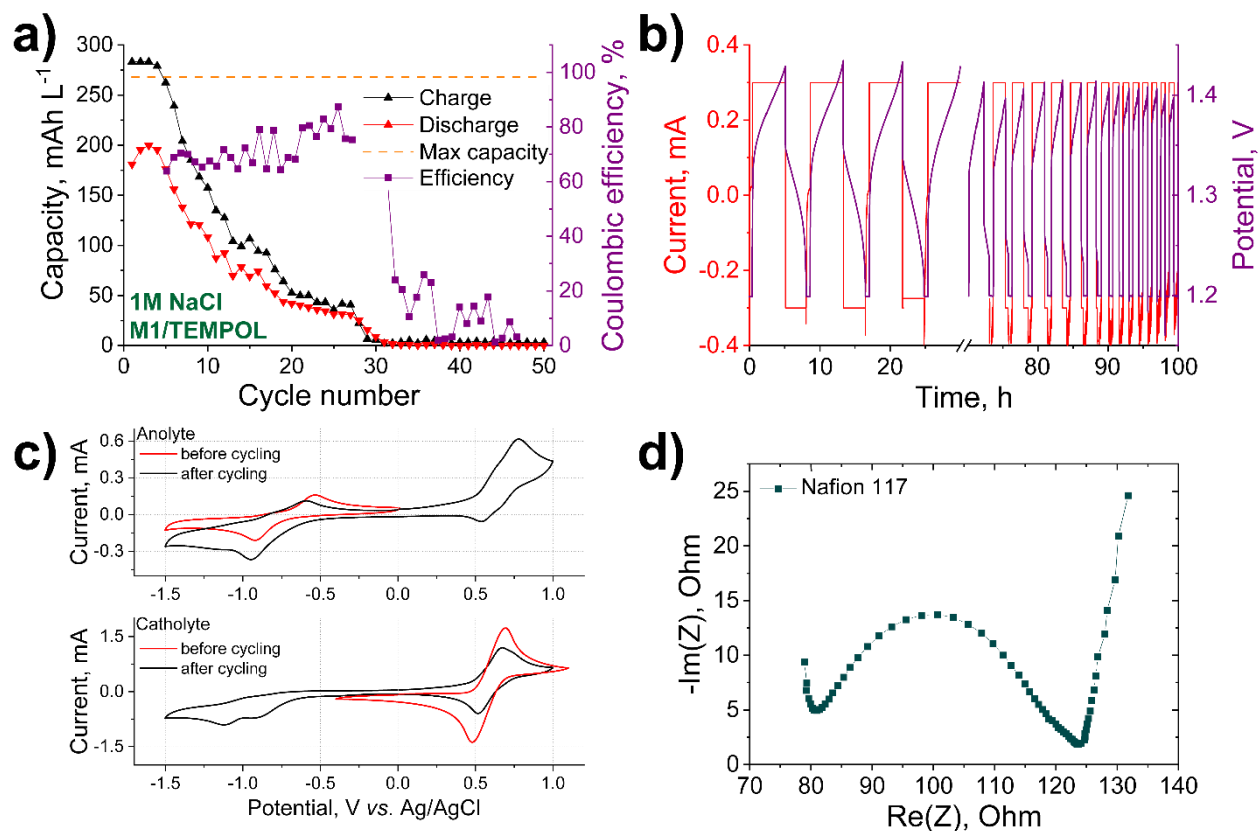

**Figure S22.** (a) Evolution of the Coulombic efficiency, charge and discharge capacities upon charge-discharge cycling of the h-cell based on **M1** anolyte and TEMPOL catholyte in 1M NaCl water solution with Nafion 117 membrane (unmixed electrolytes were used); (b) Cell voltage and cell current versus time profile for first 30 hours and 70-100 hours of cycling; (c) CVs of the anolyte and catholyte before and after cycling; (d) The Nyquist Plot of the redox flow battery after cycling.

Electrolyte's composition: mixed electrolytes, **M1** – 5.0 mM, **TEMPOL** -50.0 mM, NaCl – 1.0 M in deionised water. Battery charging and discharging time was limited to 18 000 seconds, that is 108% of theoretical battery capacity.

## 16. Investigation of the h-cell with Fumasept FAA-3PK-130 membrane in neutral conditions

### h-cell, Fumasept FAA-3PK-130 membrane, unmixed electrolytes

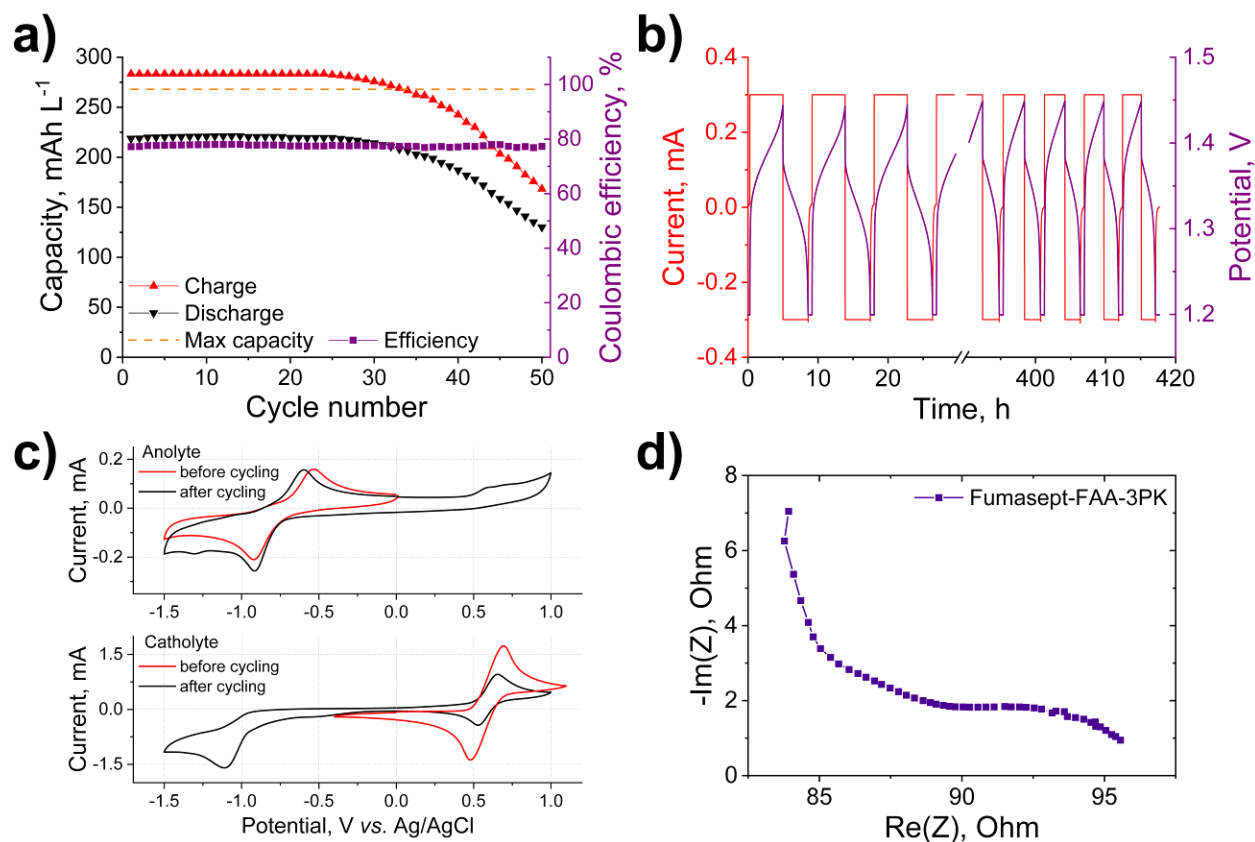

**Figure S23.** (a) Evolution of the Coulombic efficiency, charge and discharge capacities upon charge-discharge cycling for the h-cell based on **M1** anolyte and TEMPOL catholyte in 1M NaCl water solution with Fumasept FAA-3PK-130 membrane (unmixed electrolytes were used); (b) Cell voltage and cell current versus time profile for first 30 hours and 390-420 hours of cycling; (c) CVs of the anolyte and catholyte before and after cycling; (d) The Nyquist Plot of the redox flow battery after cycling.

Electrolyte's composition: mixed electrolytes, **M1** – 5.0 mM, **TEMPOL** -50.0 mM, NaCl – 1.0 M in deionised water. Battery charging and discharging time was limited to 18 000 seconds, that is 108% of theoretical battery capacity.

## 17. Investigation of the h-cell with Neosepta AHA membrane in neutral conditions

### h-cell, Neosepta AHA membrane, unmixed electrolytes

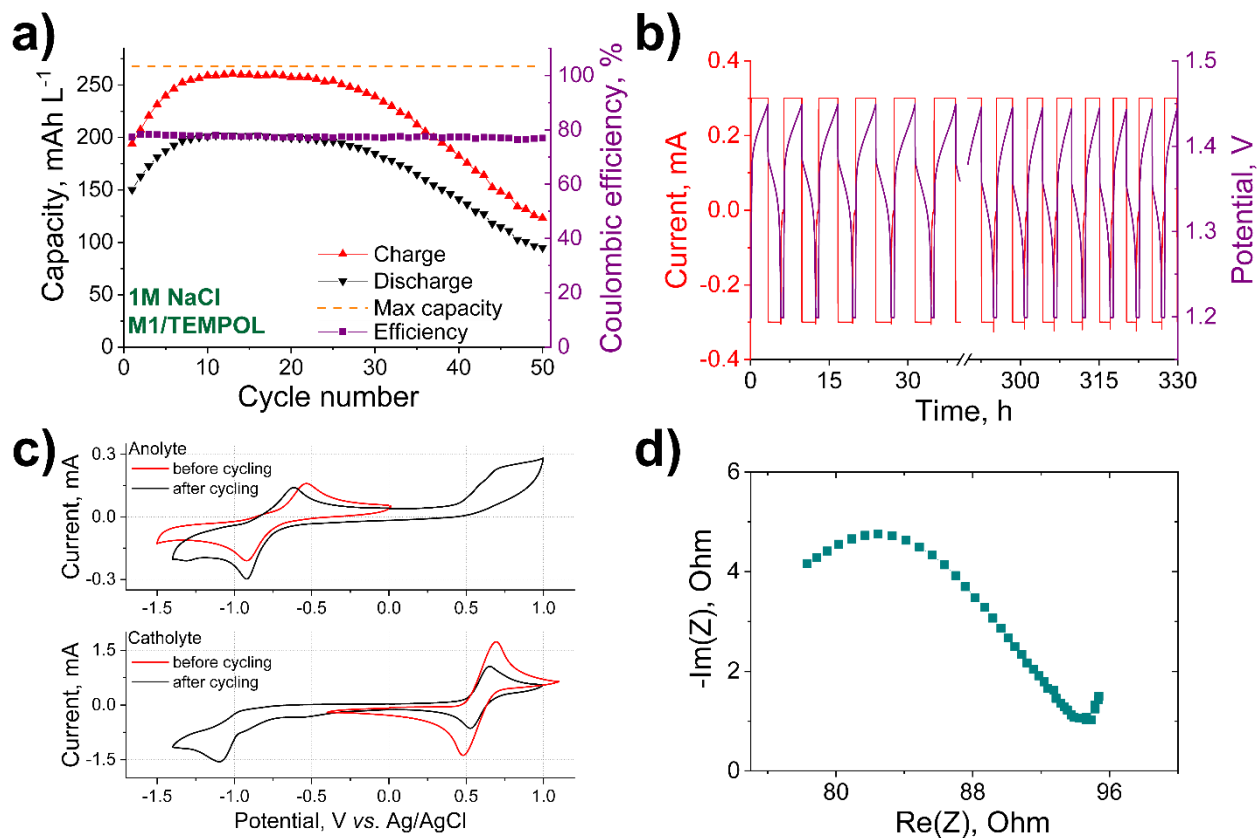

**Figure S24.** (a) Evolution of the Coulombic efficiency, charge and discharge capacities upon charge-discharge cycling for the h-cell based on **M1** anolyte and TEMPOL catholyte in 1M NaCl water solution with Neosepta AHA membrane (unmixed electrolytes were used); (b) Cell voltage and cell current versus time profile for first 40 hours and 190-330 hours of cycling; (c) CVs of the anolyte and catholyte after cycling; (d) The Nyquist Plot of the redox flow battery after cycling.

Electrolyte's composition: mixed electrolytes, **M1** – 5.0 mM, **TEMPOL** -10.0 mM, NaCl – 1.0 M in deionised water. Battery charging and discharging time was limited to 18 000 seconds, that is 108% of theoretical battery capacity.



## 18. Investigation of the RFB based on M1 anolyte in neutral conditions

### RFB, Neosepta AHA membrane, unmixed electrolytes

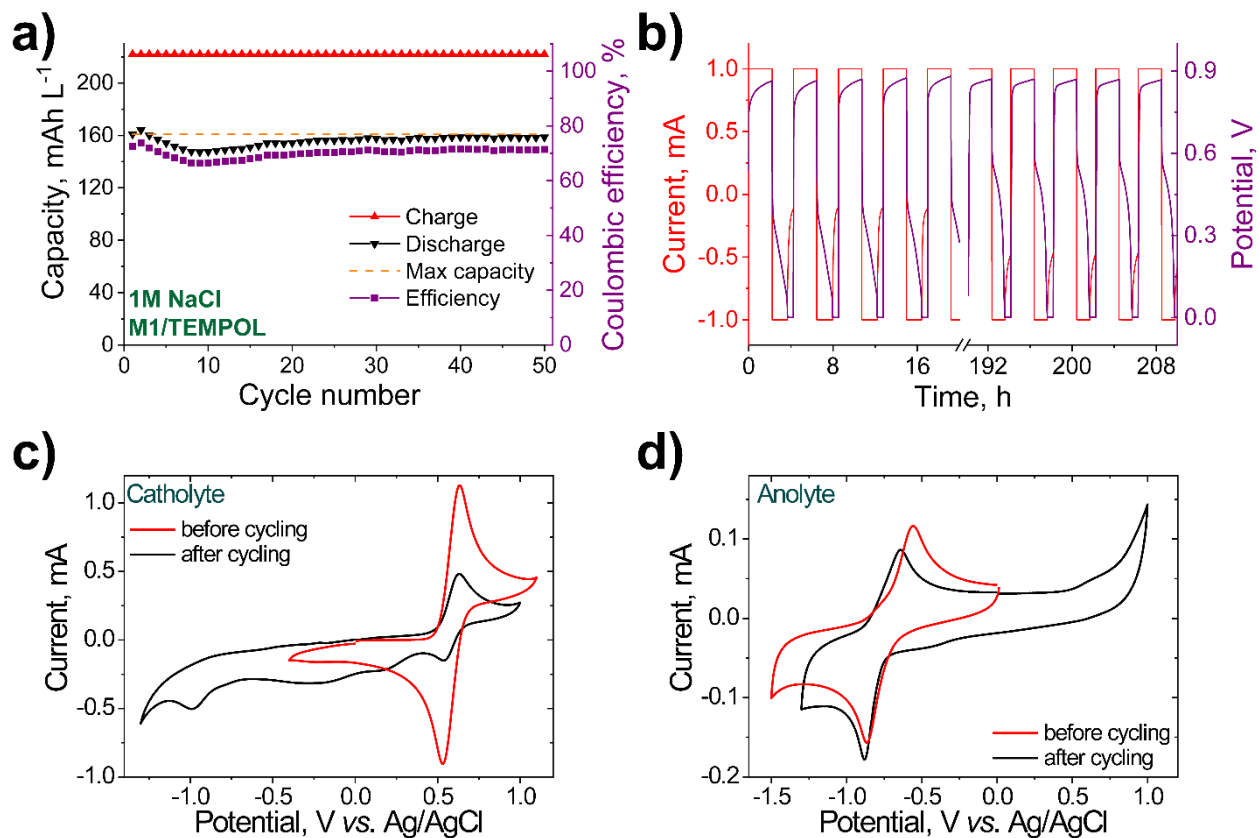

**Figure S25.** (a) Evolution of the Coulombic efficiency, charge and discharge capacities upon charge-discharge cycling for the redox flow battery based on **M1** anolyte and TEMPOL catholyte in 1M NaCl water solution with Neosepta AHA membrane and unmixed electrolytes; (b) Cell voltage and cell current versus time profile for first 20 hours and 190-210 hours of cycling; CVs of the catholyte (c) and anolyte (d) before and after cycling.

Electrolyte's composition: mixed electrolytes, **M1** – 3.0 mM, **TEMPOL** -30.0 mM, NaCl – 1.0 M in deionised water. Battery charging and discharging time was limited to 8000 seconds, that is 138% of theoretical battery capacity.

## 19. Investigation of the long cycling stability of the RFB based on M1 anolyte in neutral conditions

### RFB, Neosepta AHA membrane, unmixed electrolytes

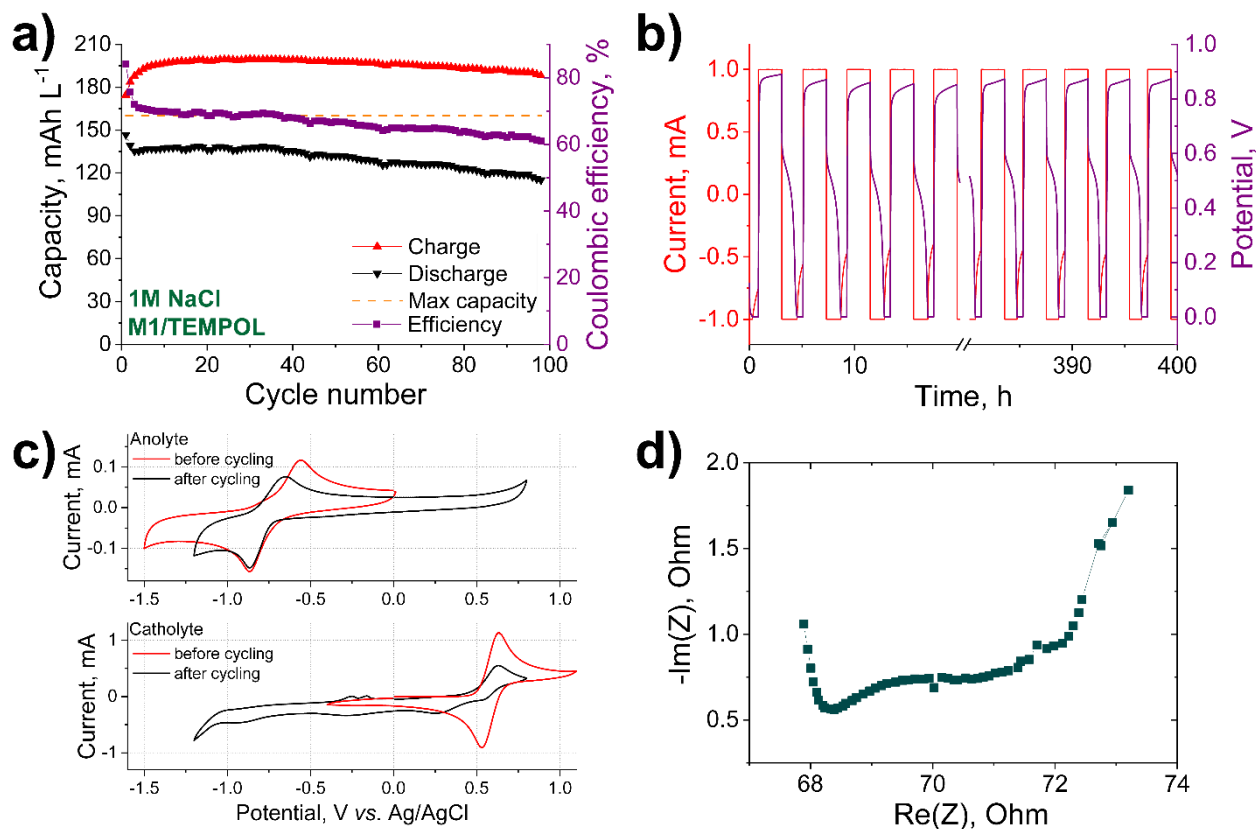

**Figure S26.** (a) Evolution of the Coulombic efficiency, charge and discharge capacities upon charge-discharge cycling for the redox flow battery based on **M1** anolyte and TEMPOL catholyte in 1M NaCl water solution with Neosepta AHA membrane and unmixed electrolytes; (b) Cell voltage and cell current versus time profile for first 20 hours and 190-210 hours of cycling; (c) CVs of the anolyte and catholyte before and after cycling; (d) The Nyquist Plot of the redox flow battery after cycling.

Electrolyte's composition: mixed electrolytes, **M1** – 3.0 mM, **TEMPOL** -30.0 mM, NaCl – 1.0 M in deionised water. Battery charging and discharging time was limited to 8000 seconds, that is 138% of theoretical battery capacity.

## 20. CV of M1 and $\text{K}_4\text{Fe}(\text{CN})_6$ in base conditions

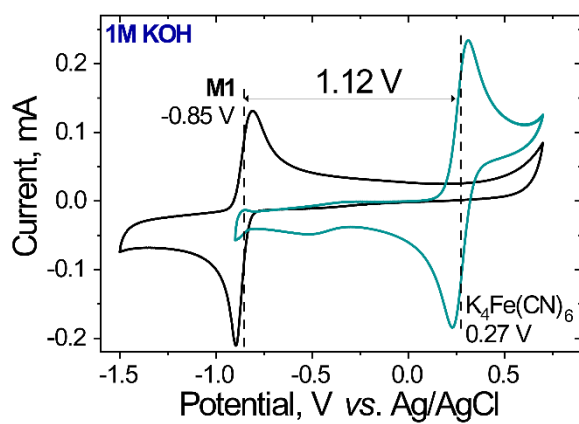

Figure S27. Cyclic voltammograms of pure **M1** and  $\text{K}_4\text{Fe}(\text{CN})_6$ .

## 21. Investigation of the h-cell based on M1 anolyte in basic conditions upon potentiostatic cycling

### h-cell, Neosepta AHA membrane, unmixed electrolytes

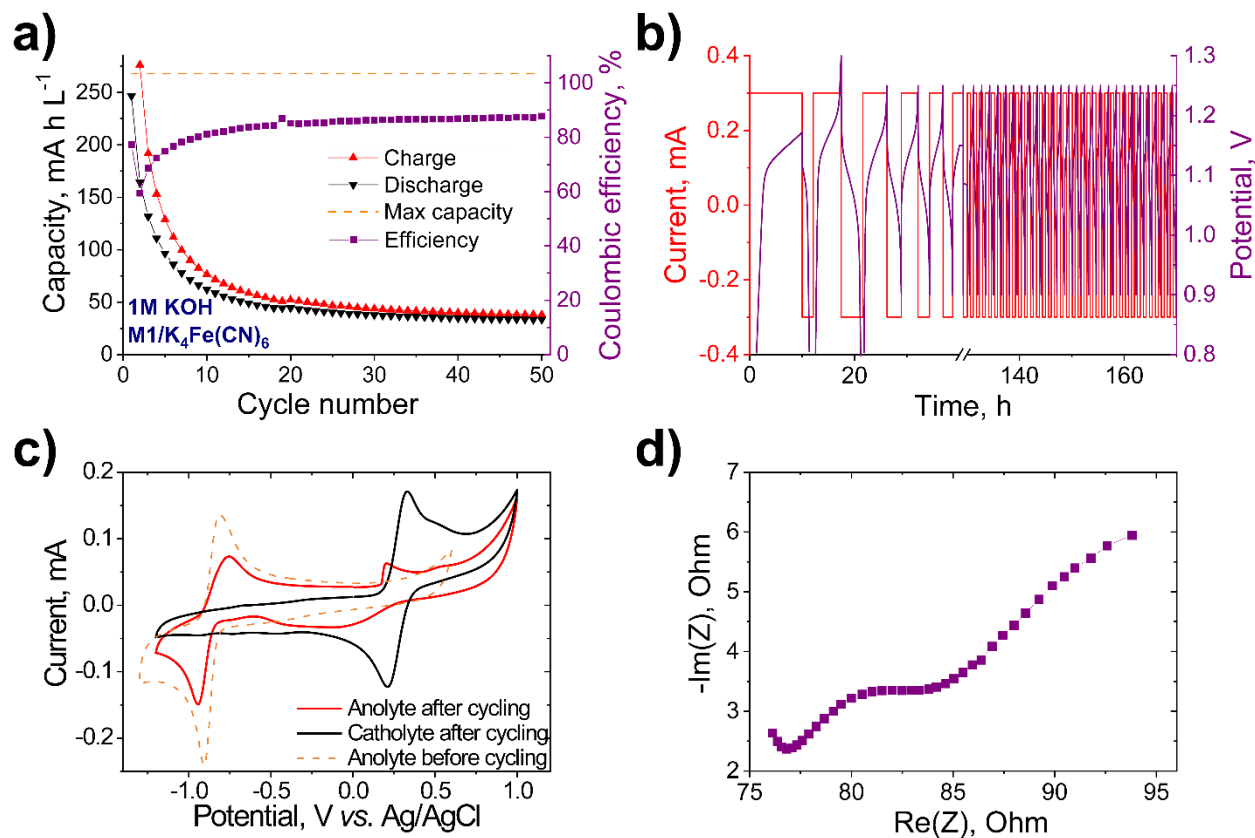

**Figure S28.** (a) Evolution of the Coulombic efficiency, charge and discharge capacities upon potentiostatic charge-discharge cycling for the h-cell based on **M1** anolyte and K<sub>4</sub>Fe(CN)<sub>6</sub> catholyte in 1M KOH water solution with Neosepta AHA membrane (unmixed electrolytes were used); (b) Cell voltage and cell current versus time profile for first 30 hours and 140-170 hours of cycling; (c) CVs of the catholyte after cycling and anolyte before and after cycling; (d) The Nyquist Plot of the h-cell after cycling.

Electrolyte's composition: anolyte **M1** – 5.0 mM, KOH – 1.0 M in deionised water; catholyte K<sub>4</sub>Fe(CN)<sub>6</sub>– 15 mM, K<sub>3</sub>Fe(CN)<sub>6</sub>– 7.5 mM, KOH – 1.0 M in deionised water.

## 22. Investigation of the h-cell based on M1 anolyte in basic conditions upon mixed potentiostatic + galvanostatic cycling

h-cell, Neosepta AHA membrane, unmixed electrolytes

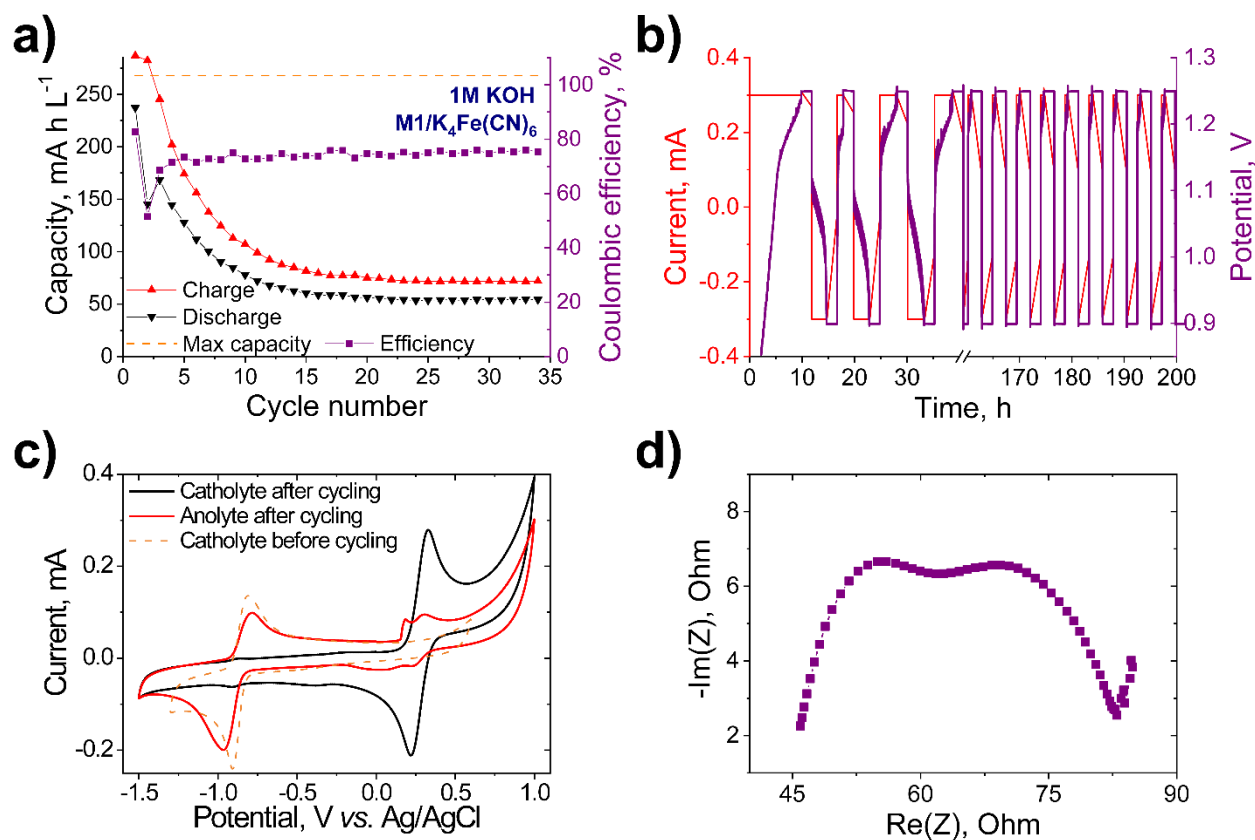

**Figure S29.** (a) Evolution of the Coulombic efficiency, charge and discharge capacities upon mixed potentiostatic + galvanostatic charge-discharge cycling for the h-cell based on **M1** anolyte and K<sub>4</sub>Fe(CN)<sub>6</sub> catholyte in 1M KOH water solution with Neosepta AHA membrane and unmixed electrolytes; (b) Cell voltage and cell current versus time profile for first 40 hours and 160-200 hours of cycling; (c) CVs of the catholyte after cycling and anolyte before and after cycling; (d) The Nyquist Plot of the h-cell after cycling.

Electrolyte's composition: anolyte **M1** – 5.0 mM, KOH – 1.0 M in deionised water; catholyte K<sub>4</sub>Fe(CN)<sub>6</sub> – 15 mM, K<sub>3</sub>Fe(CN)<sub>6</sub> – 7.5 mM, KOH – 1.0 M in deionised water.

## 23. Investigation of the h-cell based on M1 anolyte in acidic conditions upon potentiostatic cycling

### h-cell, Neosepta AHA membrane, unmixed electrolytes

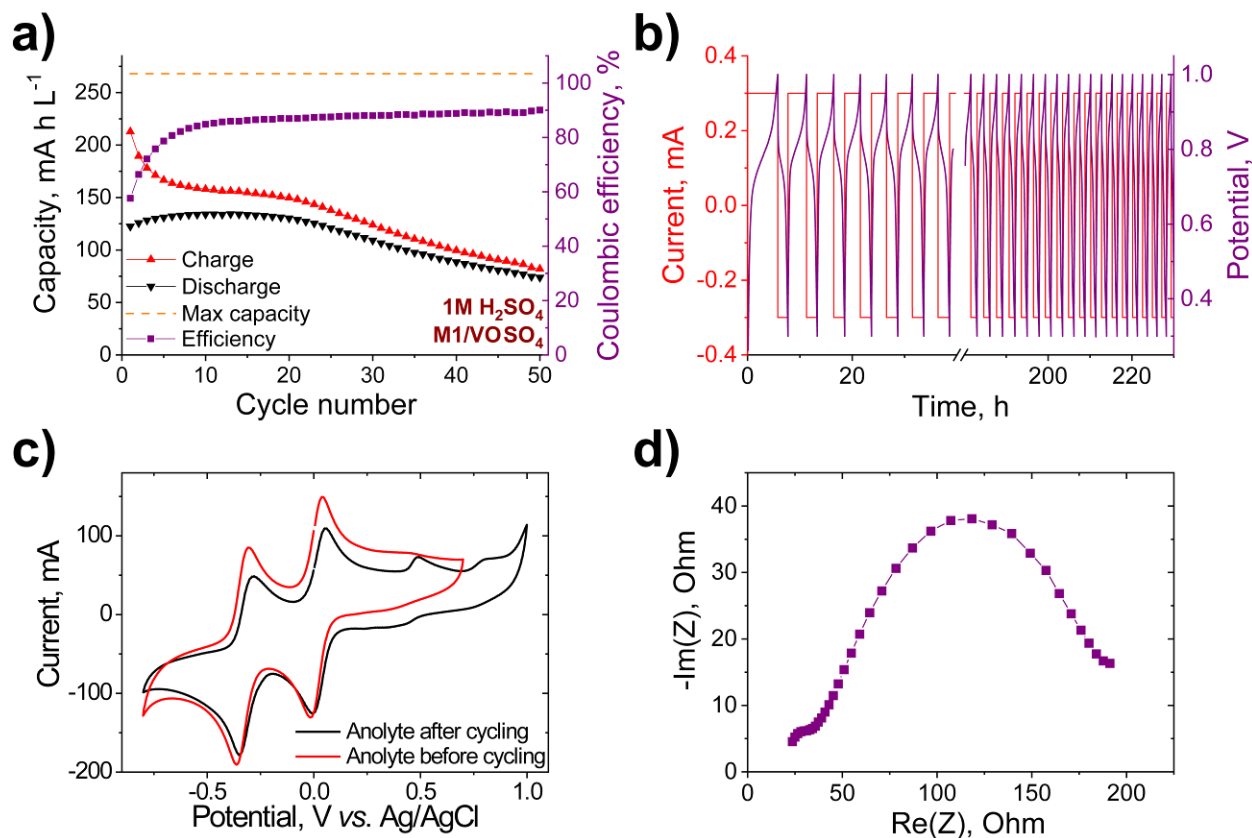

**Figure S30.** (a) Evolution of the Coulombic efficiency, charge and discharge capacities upon potentiostatic charge-discharge cycling for the h-cell based on **M1** anolyte and VOSO<sub>4</sub> catholyte in 1M H<sub>2</sub>SO<sub>4</sub> water solution with Neosepta AHA membrane and unmixed electrolytes; (b) Cell voltage and cell current versus time profile for first 30 hours and 200-230 hours of cycling; (c); CVs of the anolyte before and after cycling; (d) The Nyquist Plot of the h-cell after cycling.

Electrolyte's composition: anolyte **M1** – 5.0 mM, H<sub>2</sub>SO<sub>4</sub> – 1.0 M in deionised water; catholyte VOSO<sub>4</sub> – 15 mM, H<sub>2</sub>SO<sub>4</sub> – 1.0 M in deionised water.

## 24. Investigation of the h-cell based on M1 anolyte in acidic conditions upon mixed potentiostatic + galvanostatic cycling

### h-cell, Neosepta AHA membrane, unmixed electrolytes

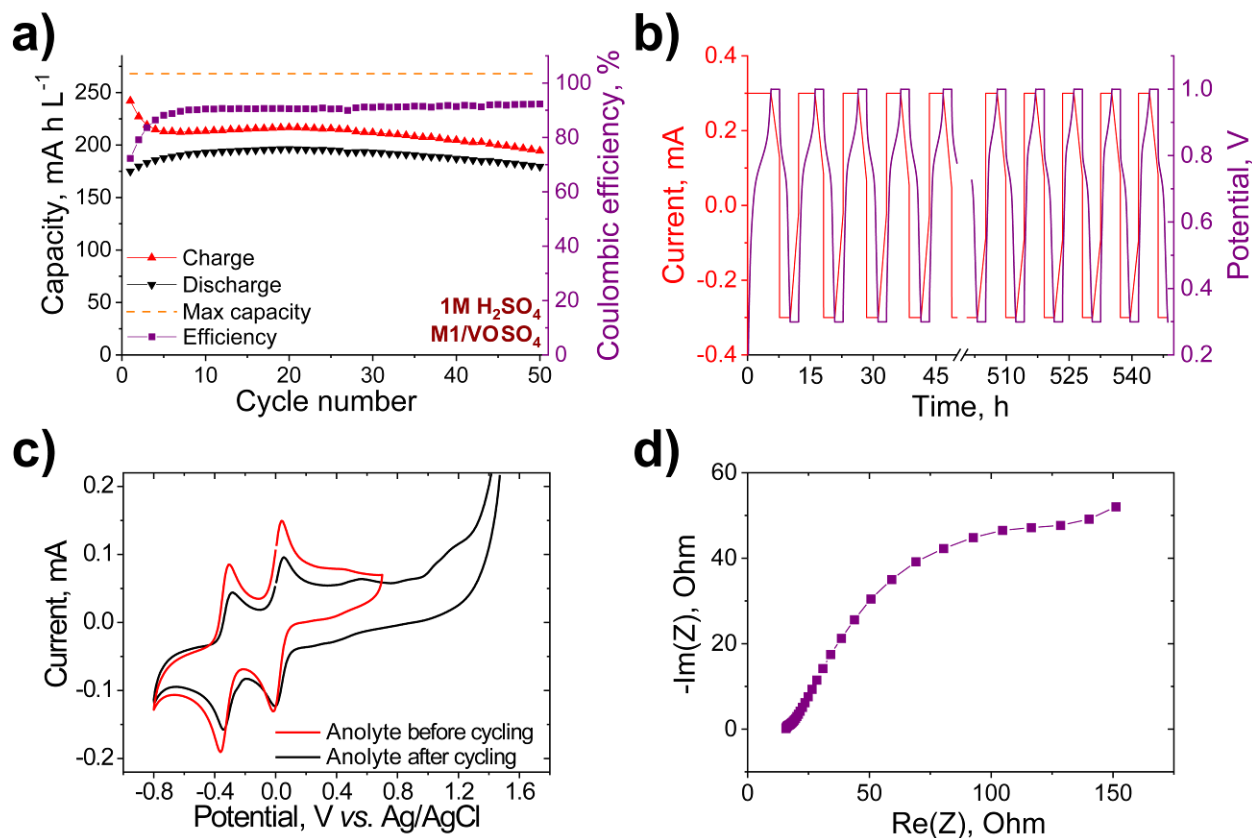

**Figure S31.** (a) Evolution of the Coulombic efficiency, charge and discharge capacities upon mixed potentiostatic + galvanostatic charge-discharge cycling for the h-cell based on **M1** anolyte and VOSO<sub>4</sub> catholyte in 1M H<sub>2</sub>SO<sub>4</sub> water solution with Neosepta AHA membrane and unmixed electrolytes; (b) Cell voltage and cell current versus time profile for first 40 hours and 510-550 hours of cycling; (c) CVs of the anolyte before and after cycling; (d) The Nyquist Plot of the the h-cell after cycling.

Electrolyte's composition: anolyte **M1** – 5.0 mM, H<sub>2</sub>SO<sub>4</sub> – 1.0 M in deionised water; catholyte VOSO<sub>4</sub> – 15 mM, H<sub>2</sub>SO<sub>4</sub> – 1.0 M in deionised water.

## 25. Investigation of the h-cell based on M1 anolyte in acidic conditions under different charge-discharge currents

### h-cell, Neosepta AHA membrane, unmixed electrolytes

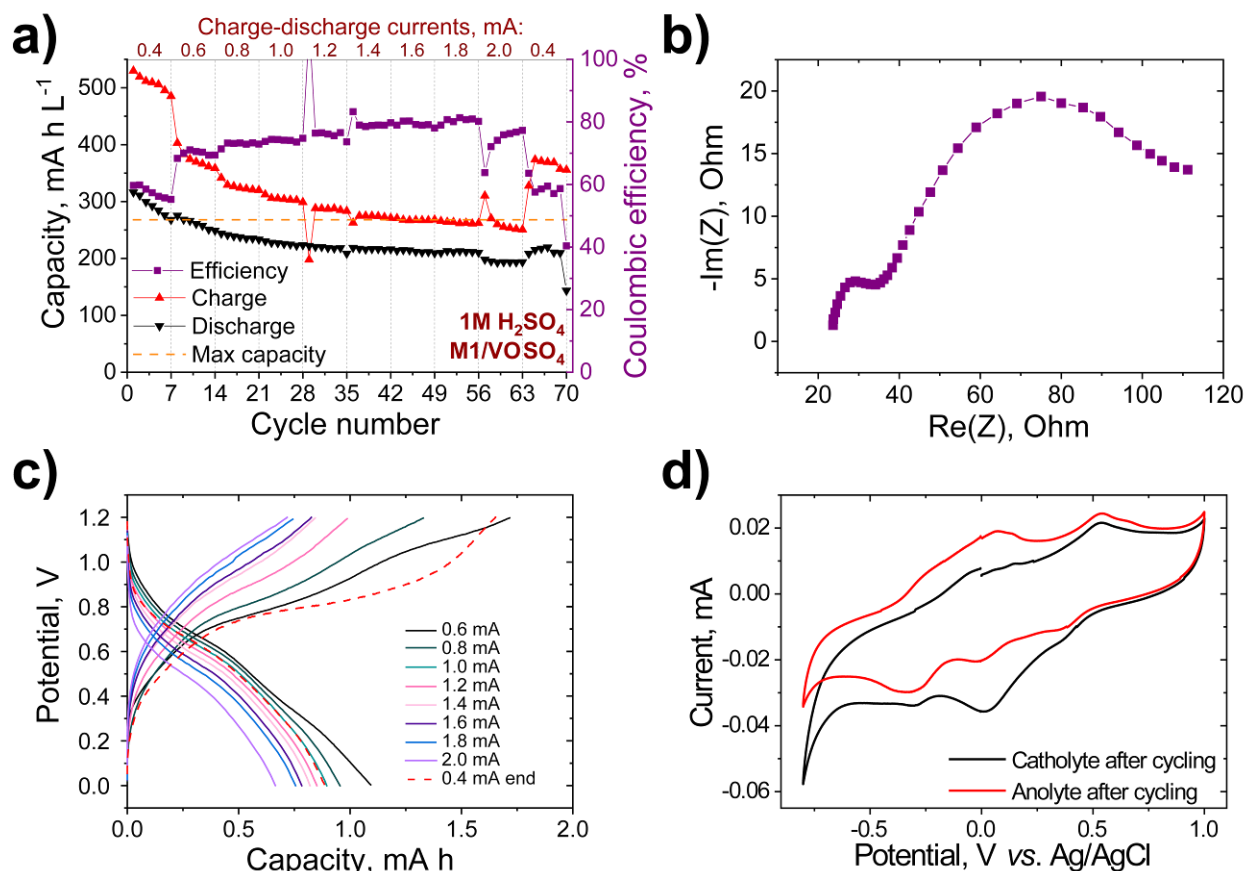

**Figure S32.** (a) Evolution of the Coulombic efficiency, charge and discharge capacities upon charge-discharge cycling at the different currents for the h-cells based on **M1** anolyte, VOSO<sub>4</sub> catholyte in 1M H<sub>2</sub>SO<sub>4</sub> water solution with Neosepta AHA membrane; (b) The Nyquist Plot of the the h-cell after cycling; (c) Evolution of the charge and discharge capacities upon charge-discharge cycling at the different currents for the h-cells based on **M1** anolyte, VOSO<sub>4</sub> catholyte in 1M H<sub>2</sub>SO<sub>4</sub> water solution with Neosepta AHA membrane; (d) CVs of the anolyte and catholyte after cycling.

Electrolyte's composition: anolyte **M1** – 5.0 mM, H<sub>2</sub>SO<sub>4</sub> – 1.0 M in deionised water; catholyte VOSO<sub>4</sub> – 15 mM, H<sub>2</sub>SO<sub>4</sub> – 1.0 M in deionised water.



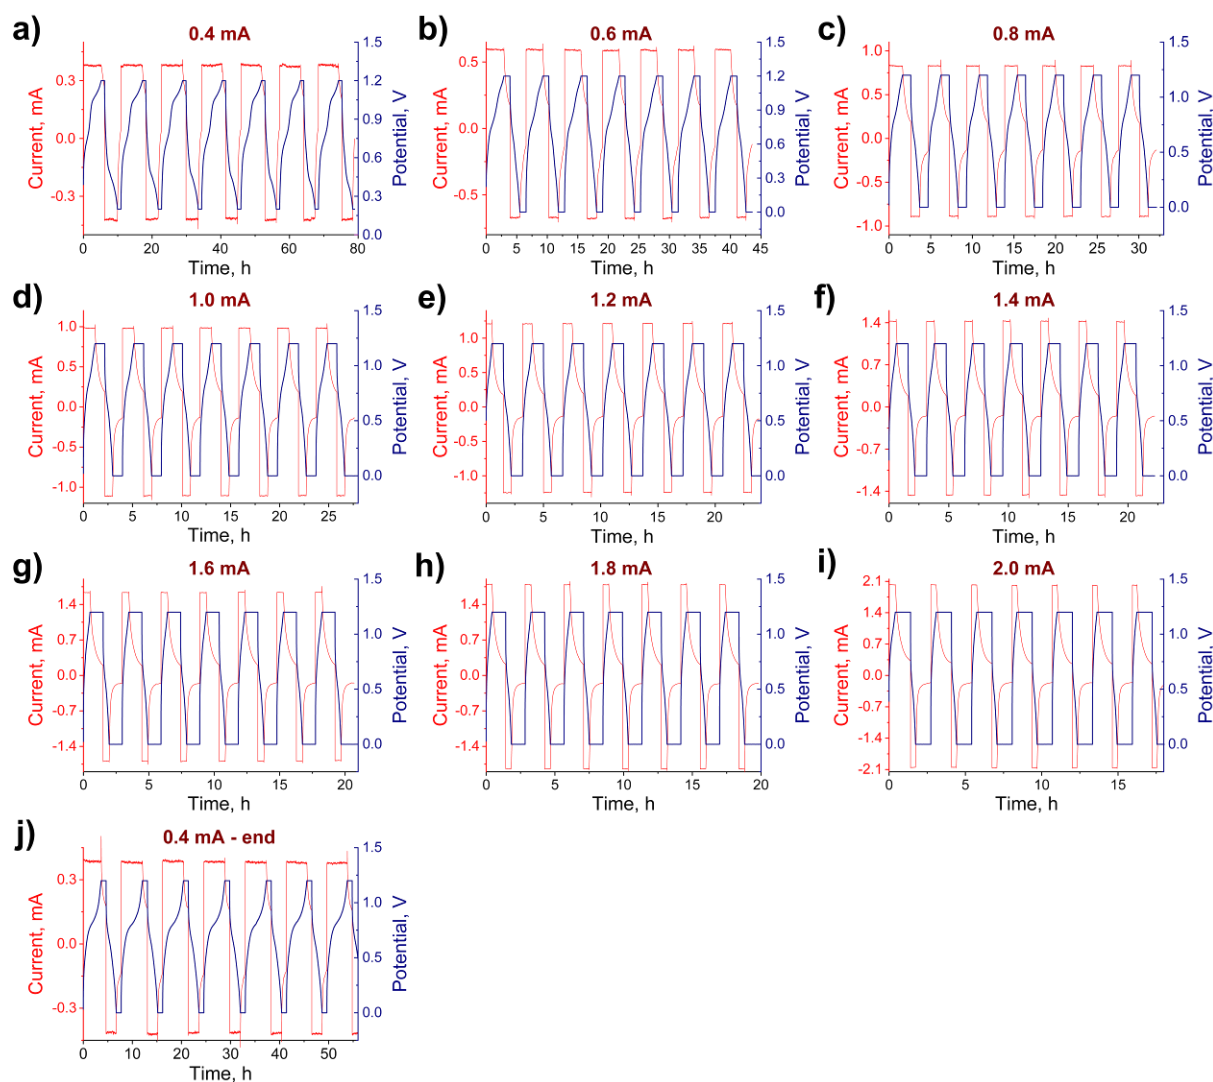

**Figure S33.** Potential-time dependence curves for the h-cell cycling based on **M1** anolyte,  $\text{VOSO}_4$  catholyte in 1M  $\text{H}_2\text{SO}_4$  water solution with Neosepta AHA membrane under different charge-discharge currents: **(a)** 0.4 mA, **(b)** 0.6 mA, **(c)** 0.8 mA, **(d)** 1.0 mA, **(e)** 1.2 mA, **(f)** 1.4 mA, **(g)** 1.6 mA, **(h)** 1.8 mA, **(i)** 2.0 mA, **(j)** 0.4 mA return to the starting value.

## 26. Investigation of the cycling stability of the RFB with Neosepta AHA membrane in acidic conditions

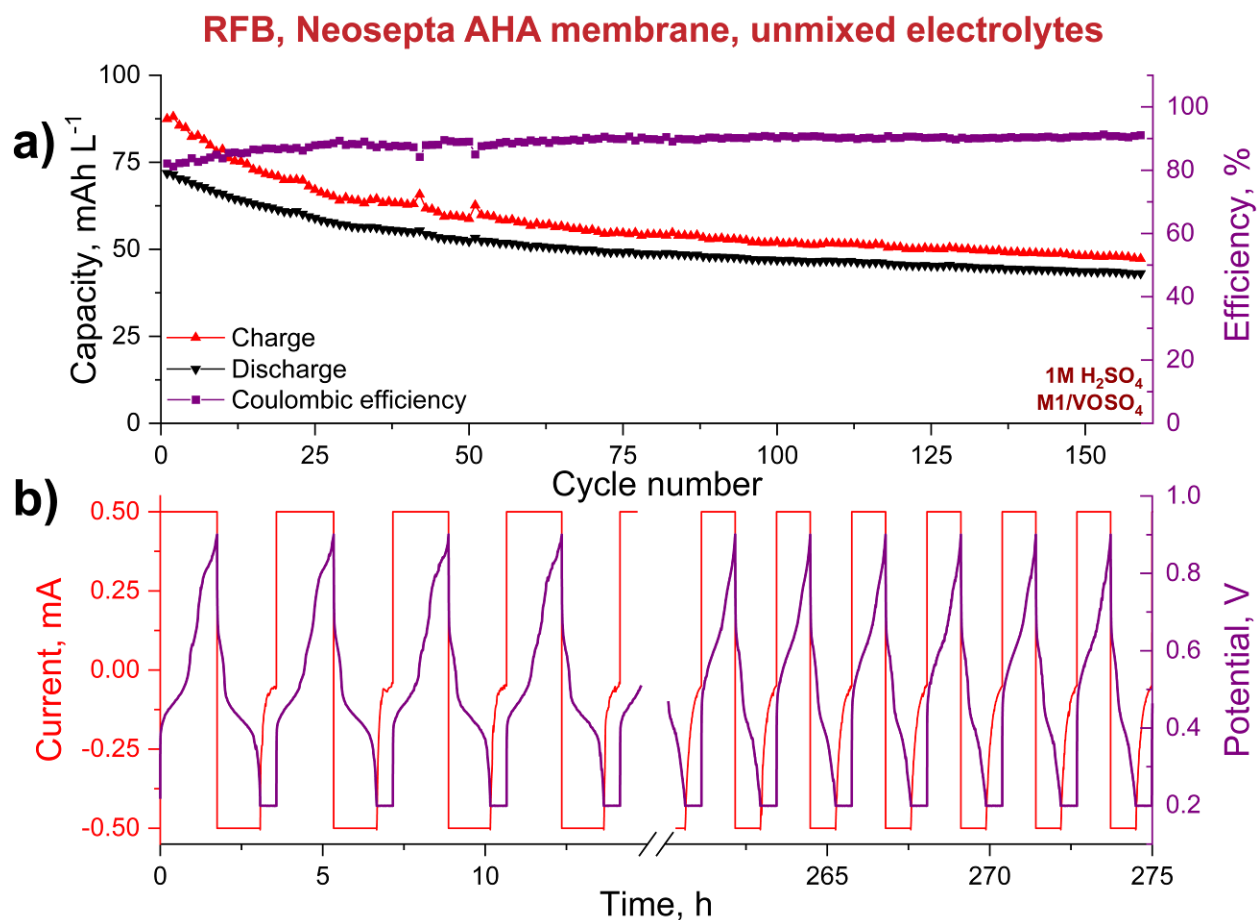

**Figure S34. (a)** Evolution of the Coulombic efficiency, charge and discharge capacities upon mixed potentiostatic + galvanostatic charge-discharge cycling for the h-cell based on **M1** anolyte and  $\text{VOSO}_4$  catholyte in 1M  $\text{H}_2\text{SO}_4$  water solution with Neosepta AHA membrane and unmixed electrolytes; **(b)** Cell voltage and cell current versus time profile for first 20 hours and 255-275 hours of cycling.

Electrolyte's composition: anolyte **M1** – 3.0 mM,  $\text{H}_2\text{SO}_4$  – 1.0 M in deionised water; catholyte  $\text{VOSO}_4$  – 10 mM,  $\text{H}_2\text{SO}_4$  – 1.0 M in deionised water.

## 27. Investigation of the long cycling stability of the RFB with Neosepta AHA membrane in acidic conditions

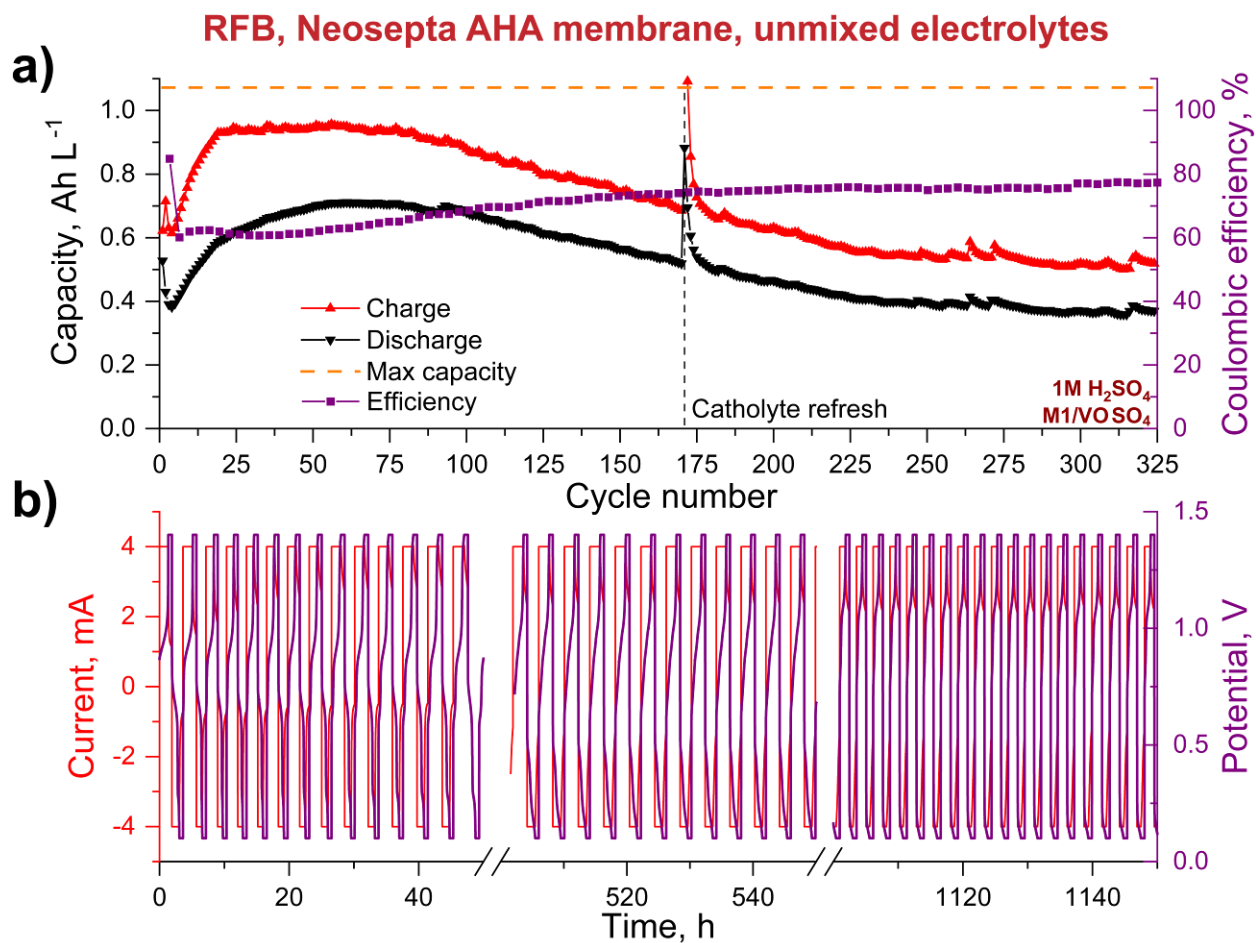

**Figure S35. (a)** Evolution of the Coulombic efficiency, charge and discharge capacities upon mixed potentiostatic + galvanostatic charge-discharge cycling for the RFB based on **M1** anolyte and VOSO<sub>4</sub> catholyte in 1M H<sub>2</sub>SO<sub>4</sub> water solution with Neosepta AHA membrane and unmixed electrolytes; **(b)** Cell voltage and cell current versus time profile for first 50 hours, 500-550 hours and 1100-1150 hours of cycling.

Electrolyte's composition: anolyte **M1** – 20.0 mM, H<sub>2</sub>SO<sub>4</sub> – 1.0 M in deionised water; catholyte VOSO<sub>4</sub> – 60 mM, H<sub>2</sub>SO<sub>4</sub> – 1.0 M in deionised water.

## References

- [S1] Hollas A.; Wei X.; Murugesan V.; Nie Z.; Li B.; Reed D.; Liu J.; Sprengle V.; Wang W., A biomimetic high-capacity phenazine-based anolyte for aqueous organic redox flow batteries, *Nat. Energy*, **2018**, 3, 508–514, doi: 10.1038/s41560-018-0167-3. 50
- [S2] Phenazine|C<sub>12</sub>H<sub>8</sub>N<sub>2</sub> - PubChem, <https://pubchem.ncbi.nlm.nih.gov/compound/Phenazine>, (accessed 28 October 2022). 72 UBACENO
- [S3] Romadina, E.I.; Komarov, D.S.; Stevenson, K.J.; Troshin, P.A. New Phenazine Based Anolyte Material for High Voltage Organic Redox Flow Batteries. *Chem. Commun.* **2021**, 57, 2986–2989, doi:10.1039/D0CC07951K. 54
- [S4] Lai, Y.Y.; Li, X.; Liu, K.; Tung, W.Y.; Cheng, C.F.; Zhu, Y. Stable Low-Cost Organic Dye Anolyte for Aqueous Organic Redox Flow Battery. *ACS Appl. Energy Mater.* **2020**, 3, 2290–2295, doi:10.1021/acsaem.9b01735. 14
- [S5] Hong J.; Kim K.; Neutral Red and Ferroin as Reversible and Rapid Redox Materials for Redox Flow Batteries, *ChemSusChem*, **2018**, 11, 1866–1872, doi: 10.1002/cssc.201800303 73 UBACENO
- [S6] Wang, C.; Li, X.; Yu, B.; Wang, Y.; Yang, Z.; Wang, H.; Lin, H.; Ma, J.; Li, G.; Jin, Z. Molecular Design of Fused-Ring Phenazine Derivatives for Long-Cycling Alkaline Redox Flow Batteries. *ACS Energy Lett.* **2020**, 5, 411–417, doi:10.1021/acsenergylett.9b02676. 51
- [S7] Pang, S.; Wang, X.; Wang, P.; Ji, Y. Biomimetic Amino Acid Functionalized Phenazine Flow Batteries with Long Lifetime at Near-Neutral PH. *Angew. Chemie - Int. Ed.* **2021**, 60, 5289–5298, doi:10.1002/anie.202014610. 52
- [S8] Xu, J.; Pang, S.; Wang, X.; Wang, P.; Ji, Y. Ultrastable Aqueous Phenazine Flow Batteries with High Capacity Operated at Elevated Temperatures. *Joule* **2021**, 5, 2437–2449, doi:10.1016/j.joule.2021.06.019. 49
- [S9] Winsberg, J.; Stolze, C.; Muench, S.; Liedl, F.; Hager, M.D.; Schubert, U.S. TEMPO/Phenazine Combi-Molecule: A Redox-Active Material for Symmetric Aqueous Redox-Flow Batteries. *ACS Energy Lett.* **2016**, 1, 976–980, doi:10.1021/acsenergylett.6b00413. 52
- [S10] Wellala N.; Hollas A.; Duanmu K.; Murugesan V.; Zhang X.; Feng R.; Shao Y.; Wang W., Decomposition pathways and mitigation strategies for highly-stable hydroxyphenazine flow battery anolytes, *J. Mater. Chem. A*, **2021**, 9, 21918–21928. doi: 10.1039/D1TA03655F. 74 UBACENO
- [S11] Safety data sheet “Potassium Hydroxide, 0.5N (0.5M)”, according to Federal Register, 77 (58) March 26, **2012**, Rules and Regulations
- [S12] Rhodes F.; Barbour C.; The Viscosities of Mixtures of Sulfuric Acid and Water, *Ind. Eng. Chem.*, **1923**, 15, 850–852. doi: 10.1021/ie50164a033
